# Supplementary material for: Integrated Proteomics Unveils Nuclear PDE3A2 as a Regulator of Cardiac Myocyte Hypertrophy
Source: PubMed Central journal article supplement (PMC10045983; doi:10.1161/circresaha.122.321448), 2023-03-08

Full unedited gel for Figure 4a

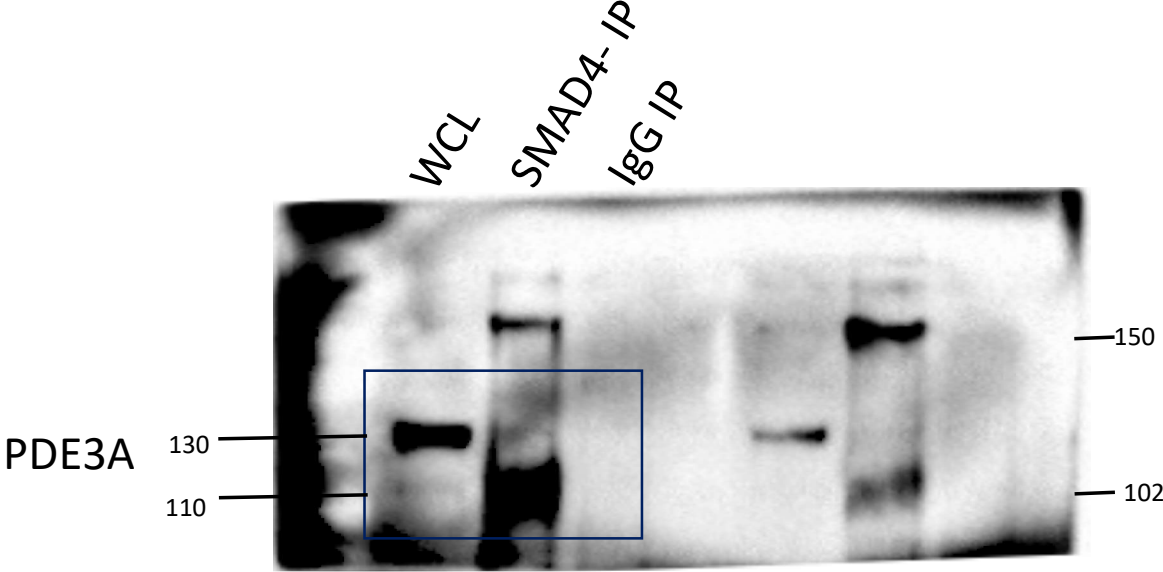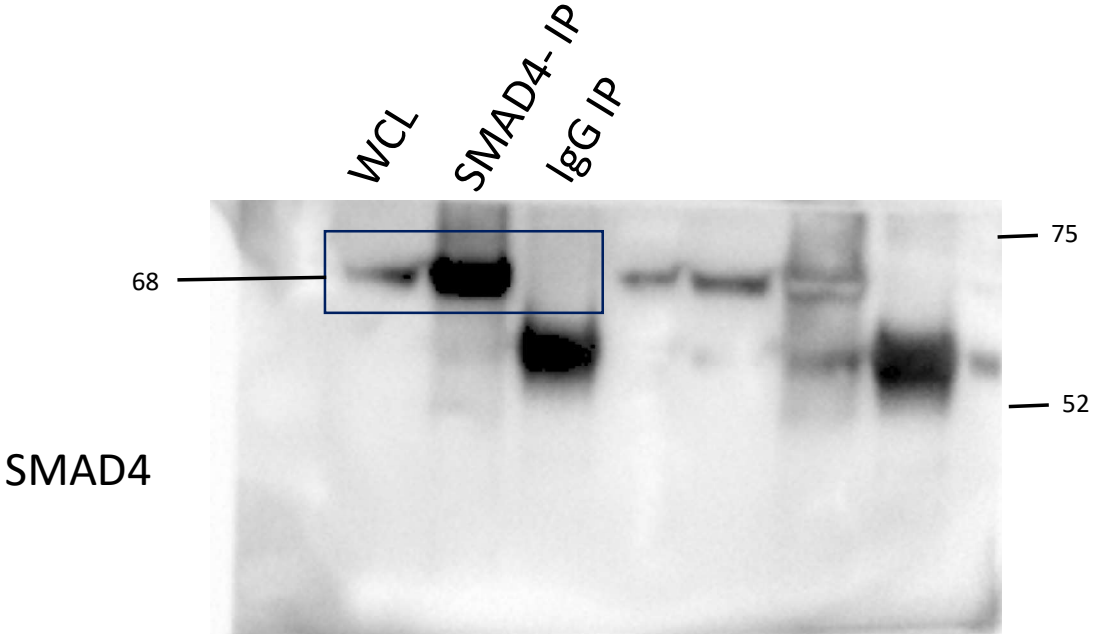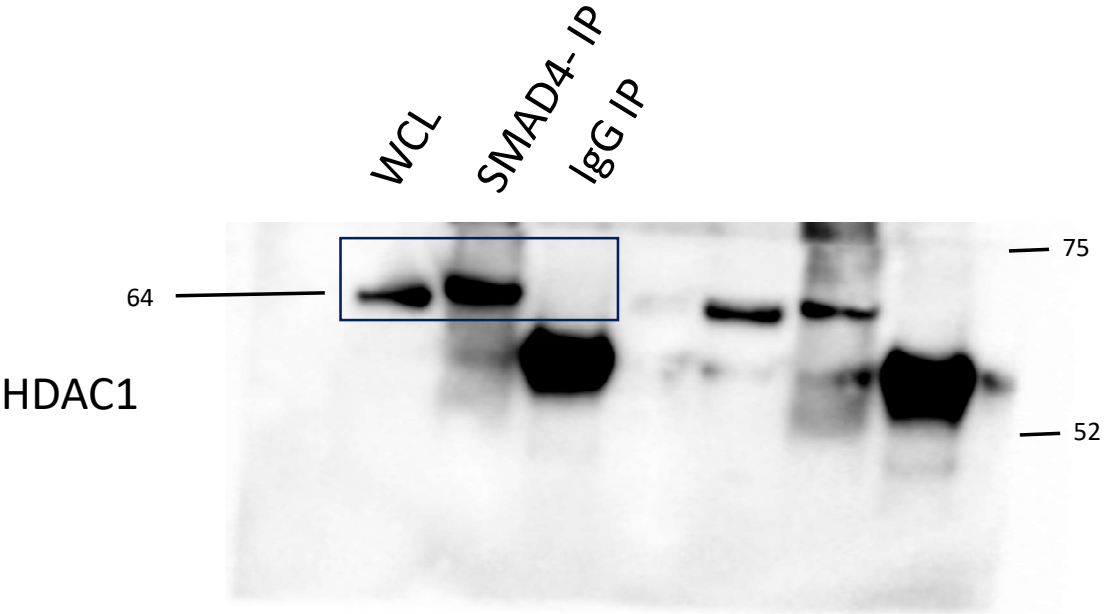

Full unedited gel for Figure 4b

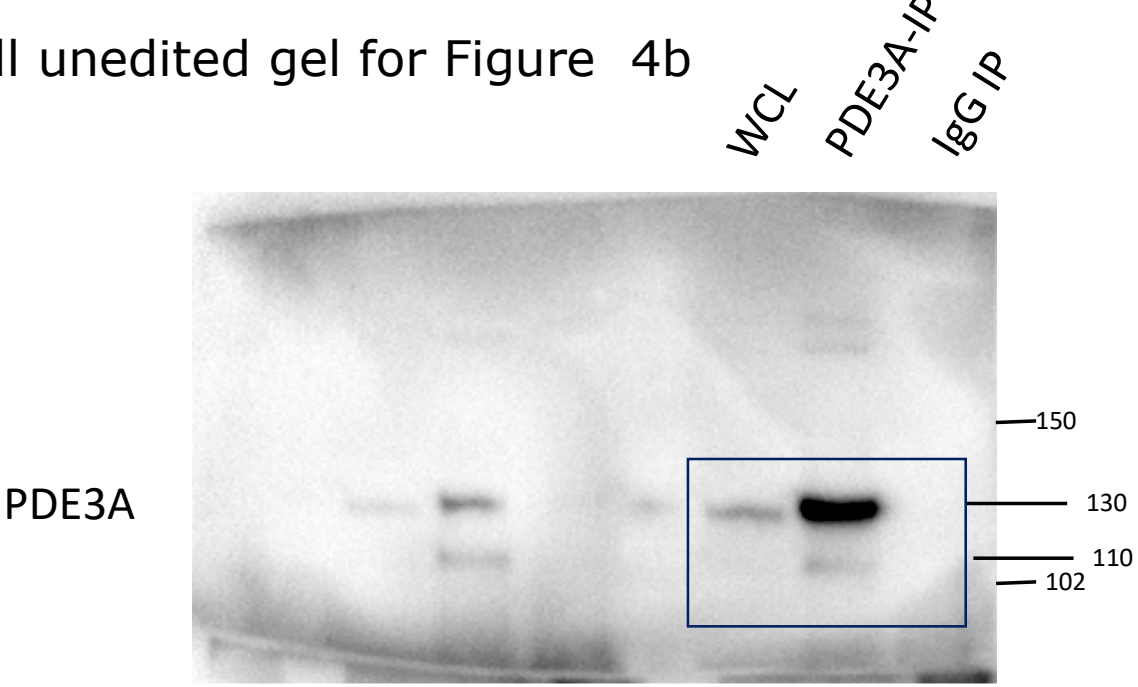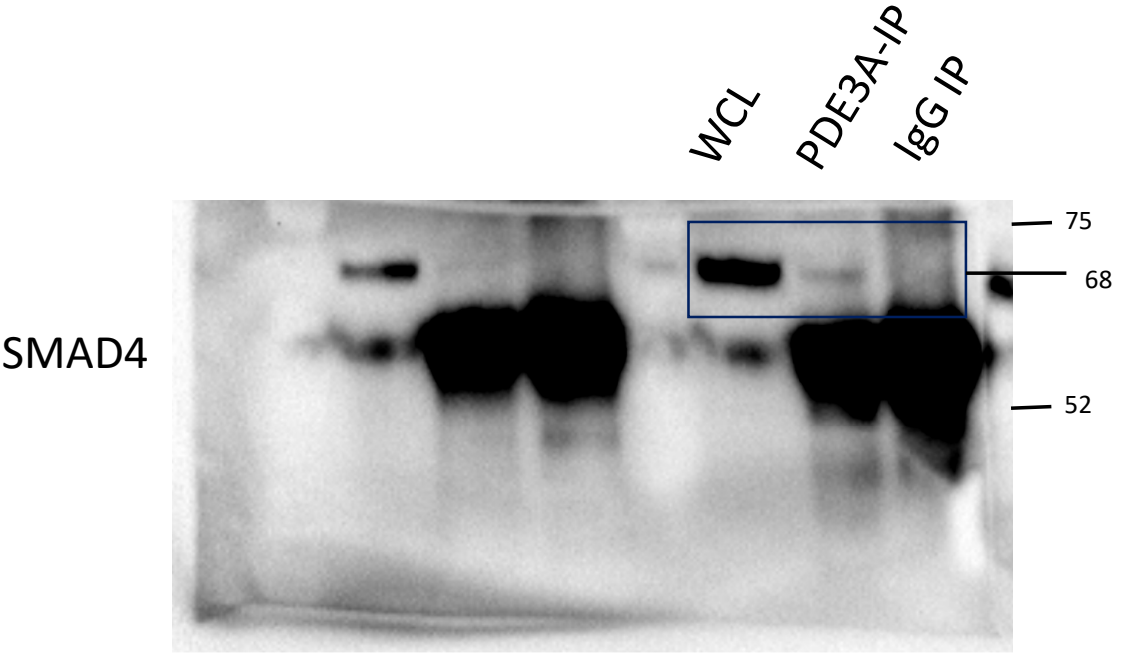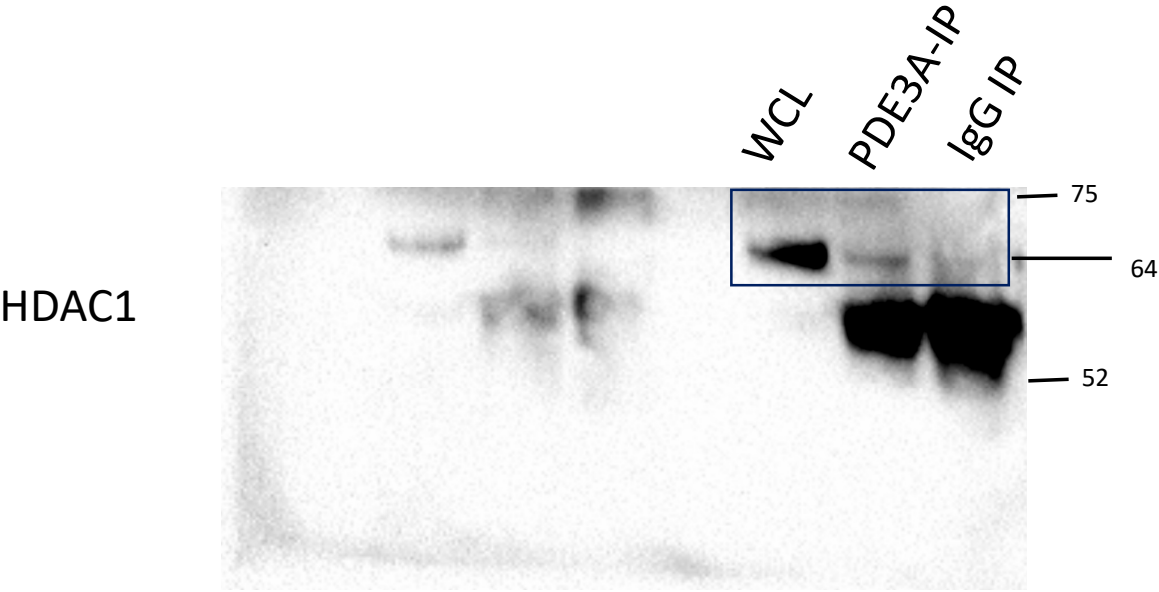

# Full unedited gel for Figure 4d

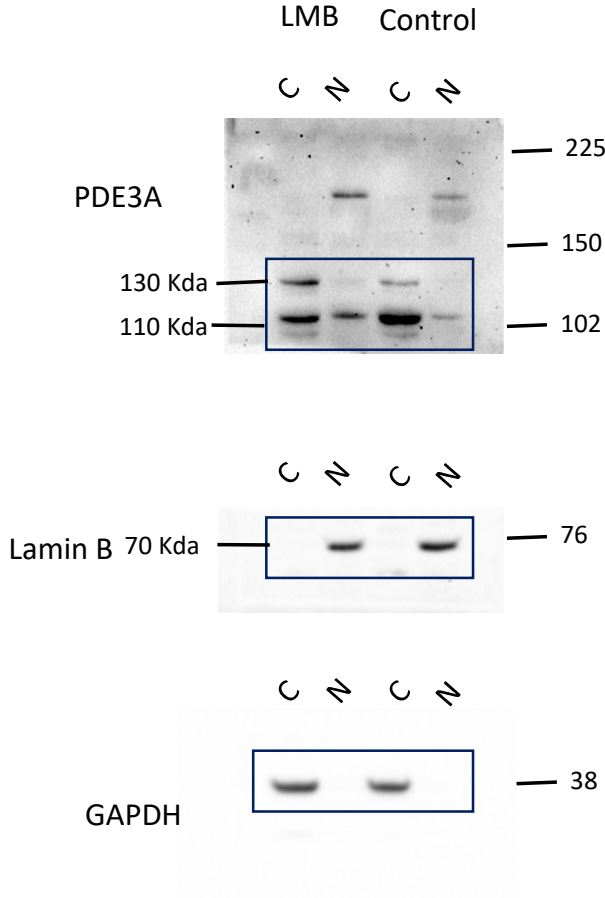

Full unedited gel for Figure 5b

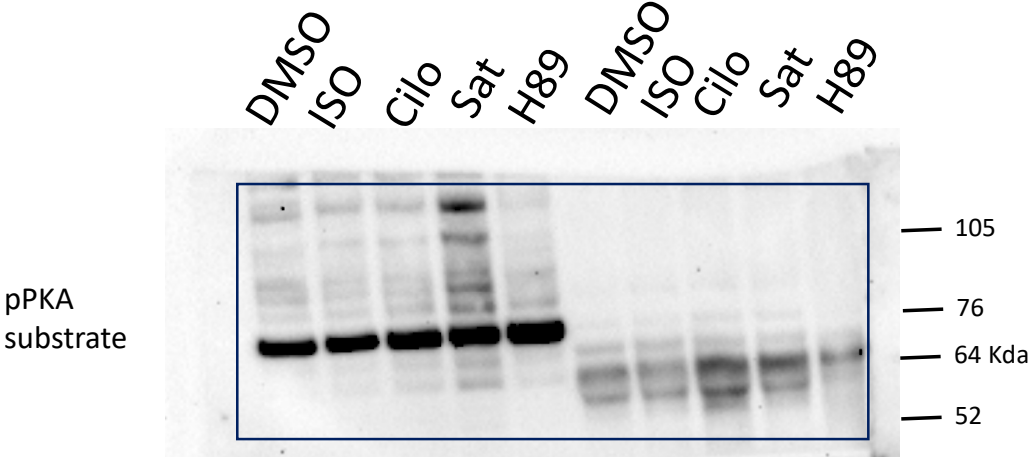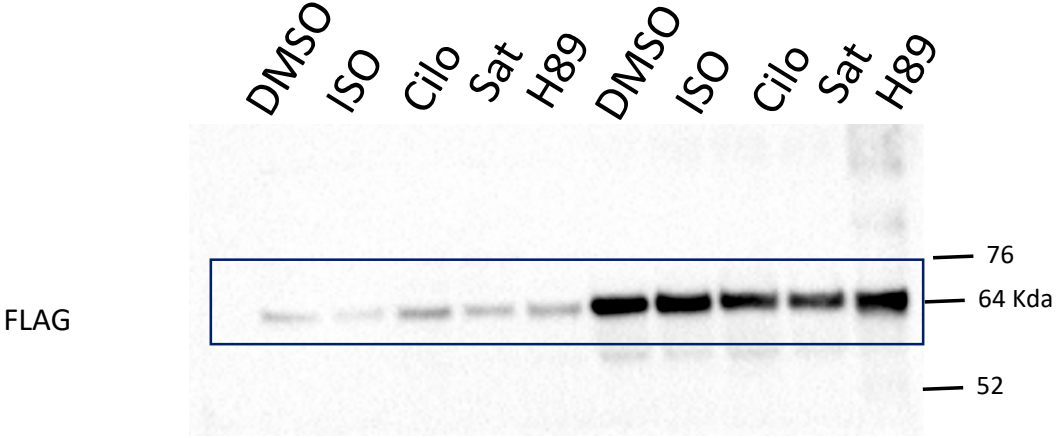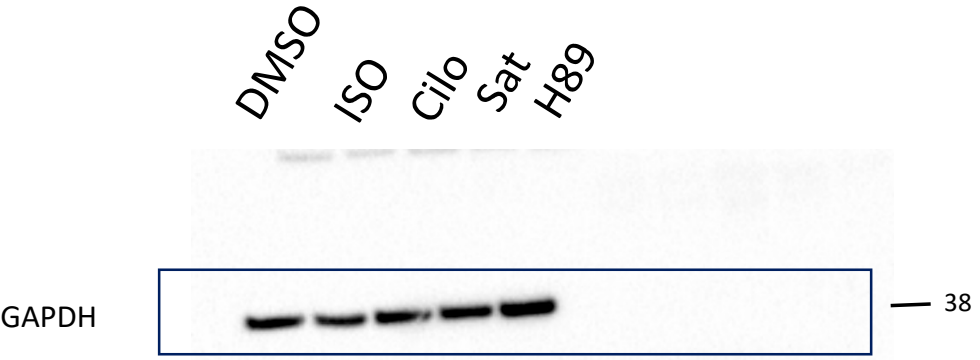

### Full unedited gel for Figure 5c

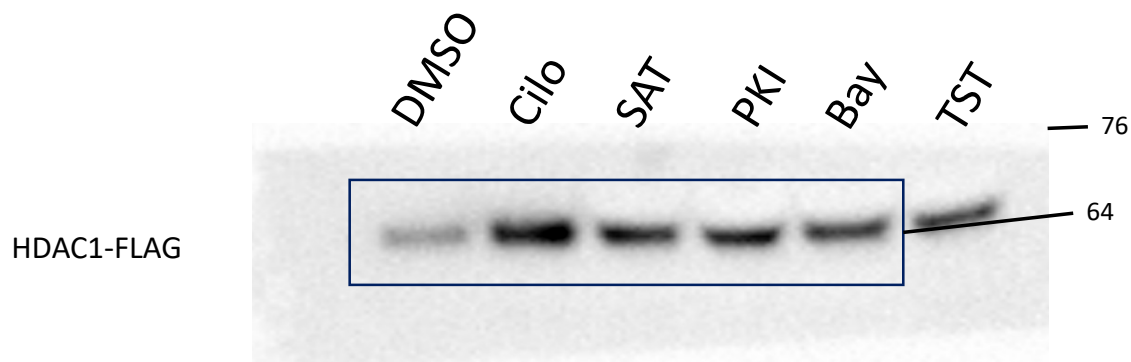

### Full unedited gel for Figure 5d

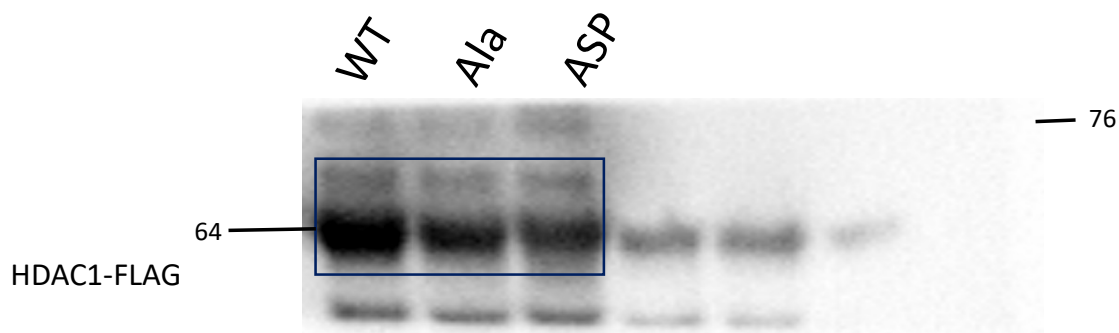

### Full unedited gel for Figure 5e

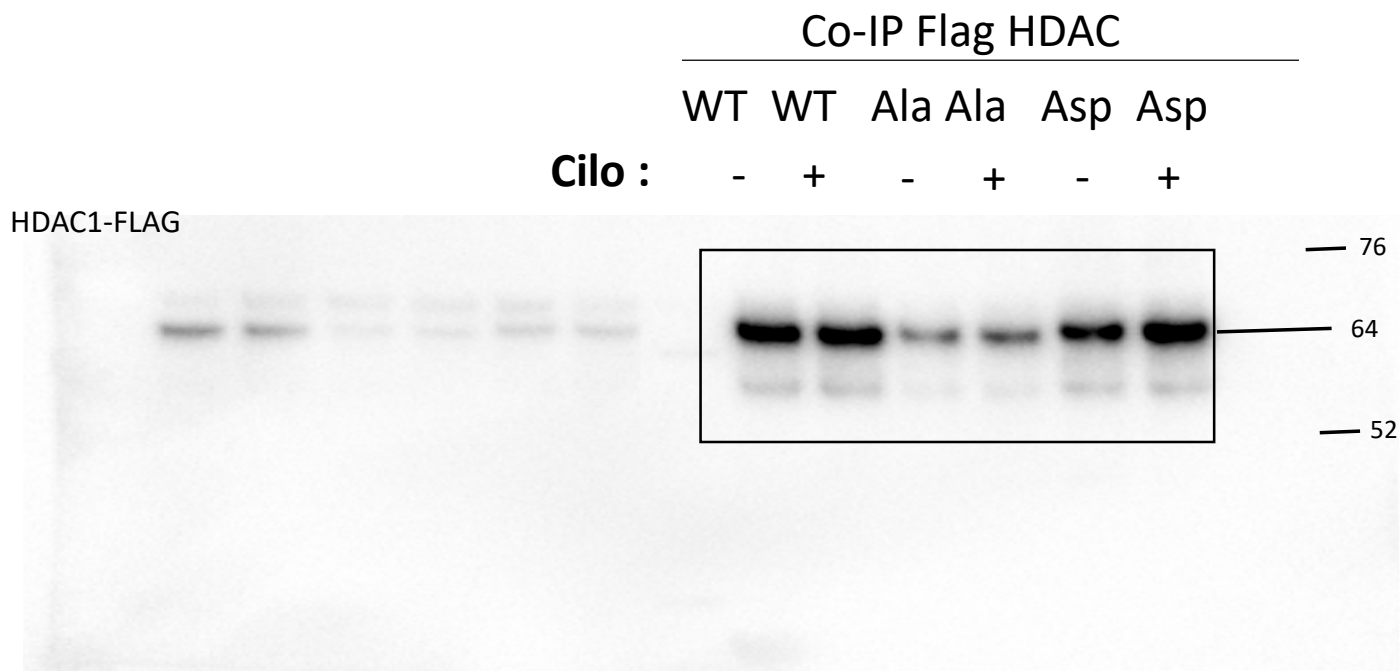

Full unedited gel for Figure 5f

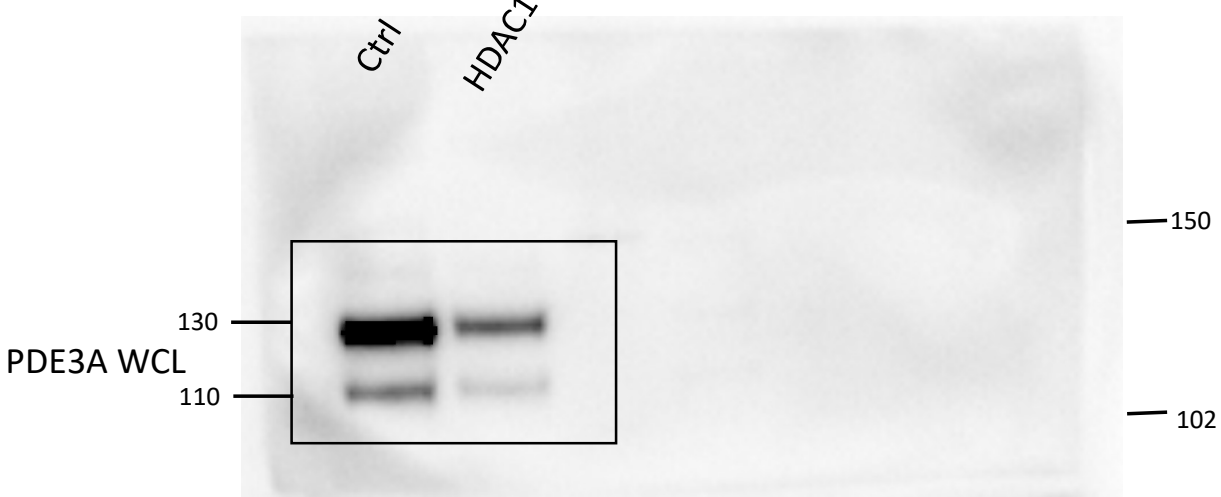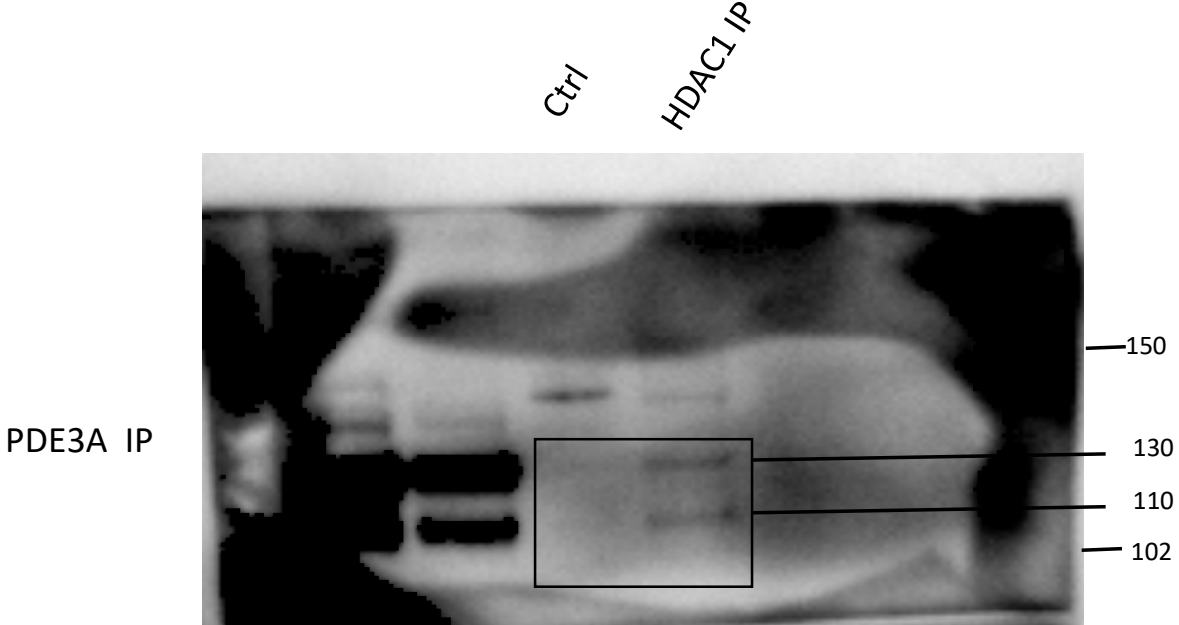

# Full unedited gel for Figure 5f

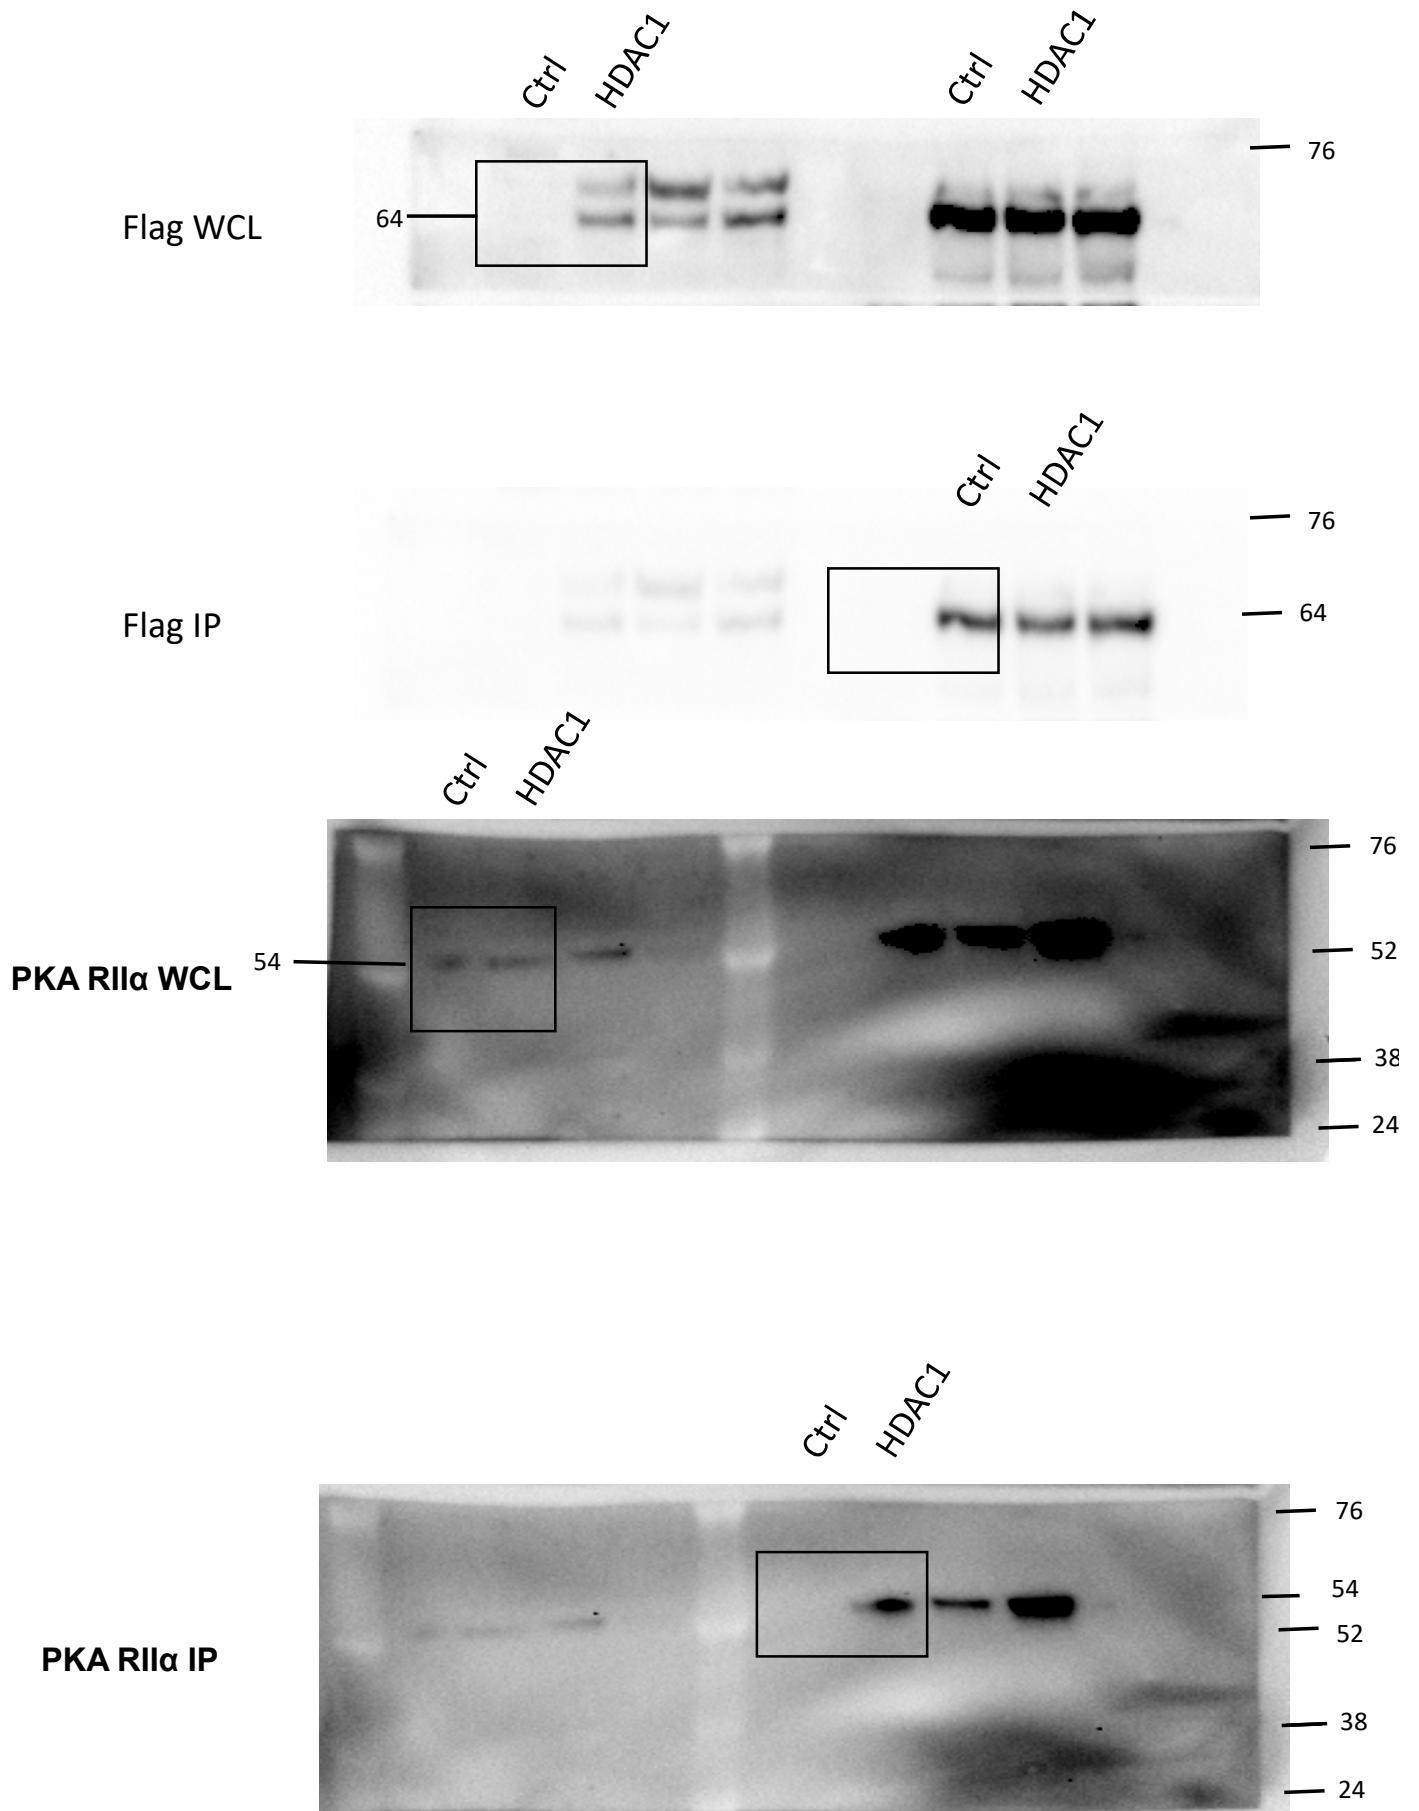

# Full unedited gel for Figure 5f

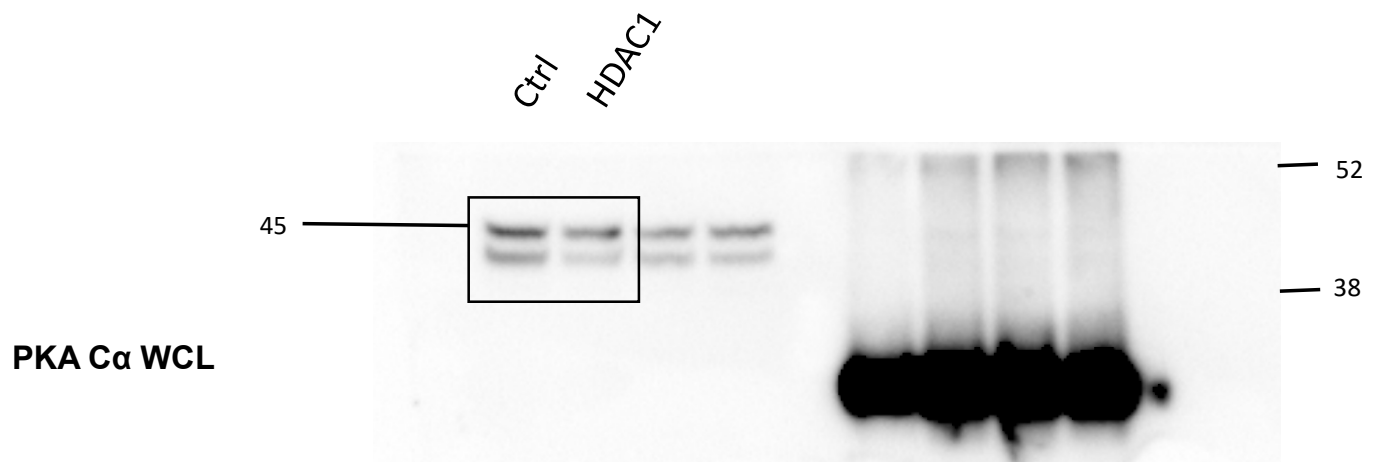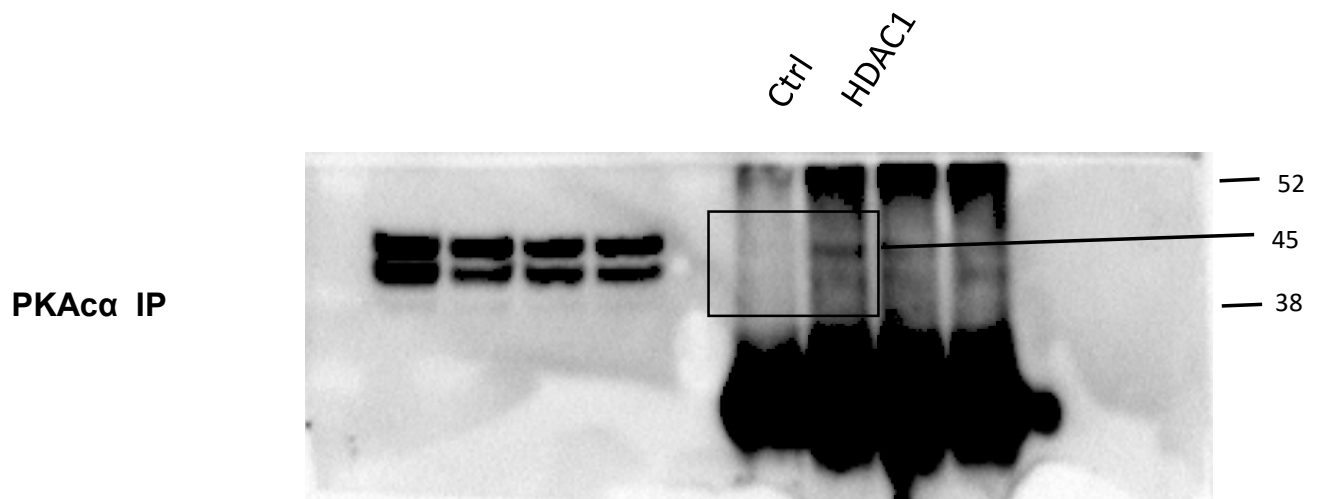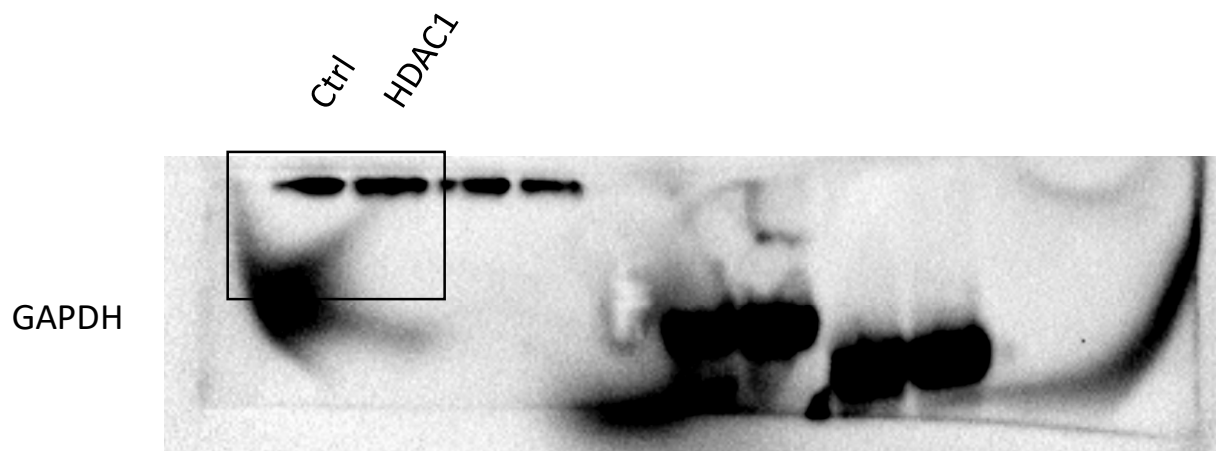



Full unedited gel for Figure 6b

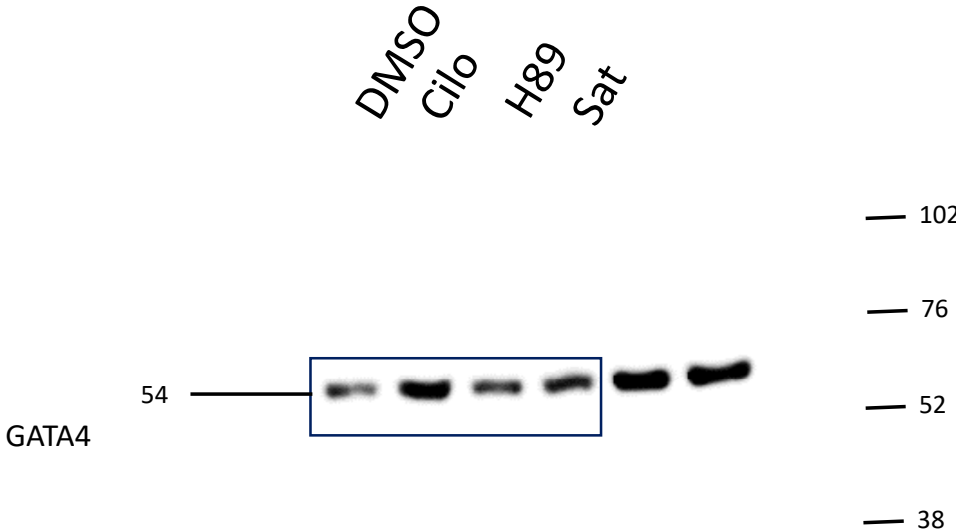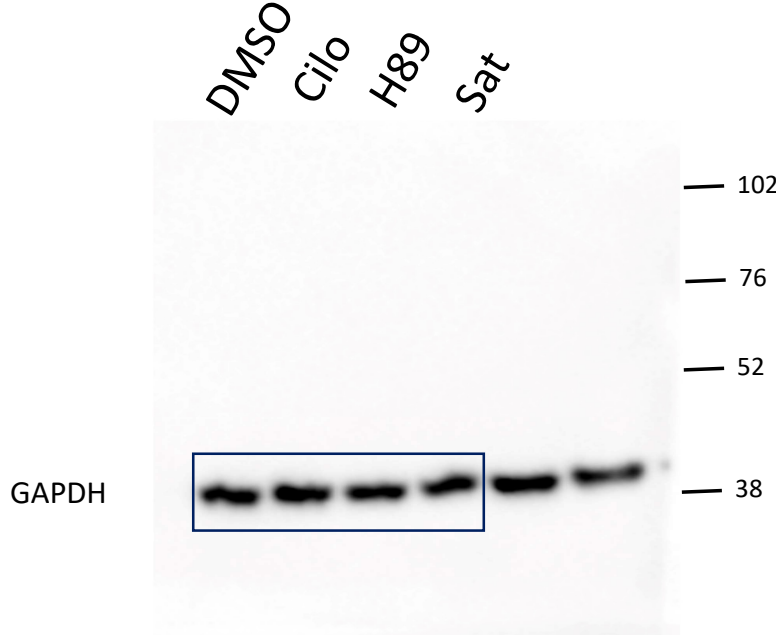

Full unedited gel for Figure 6c

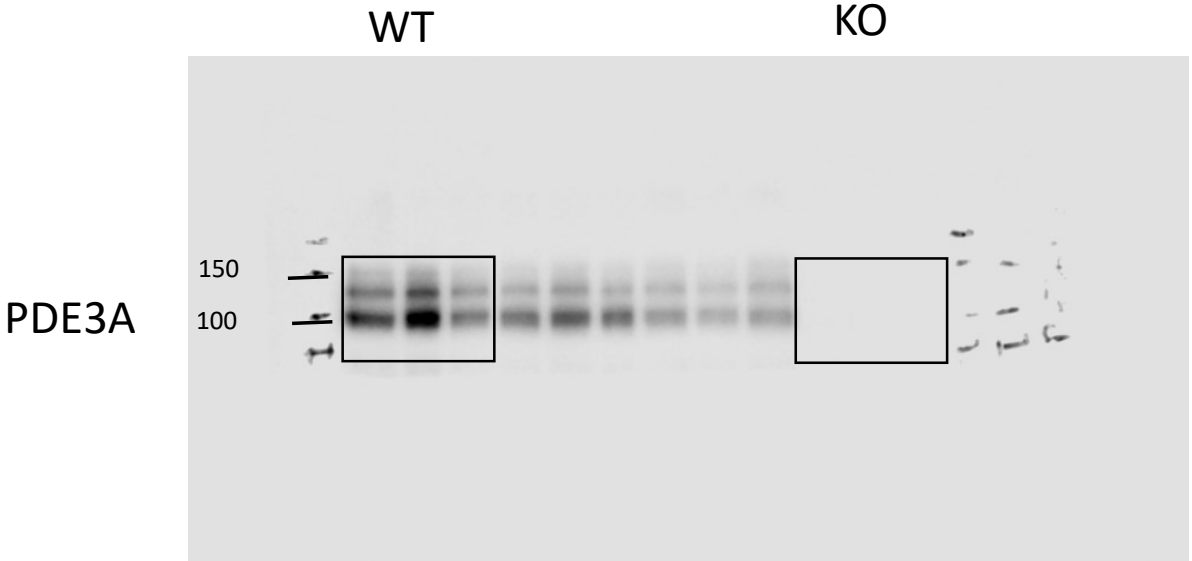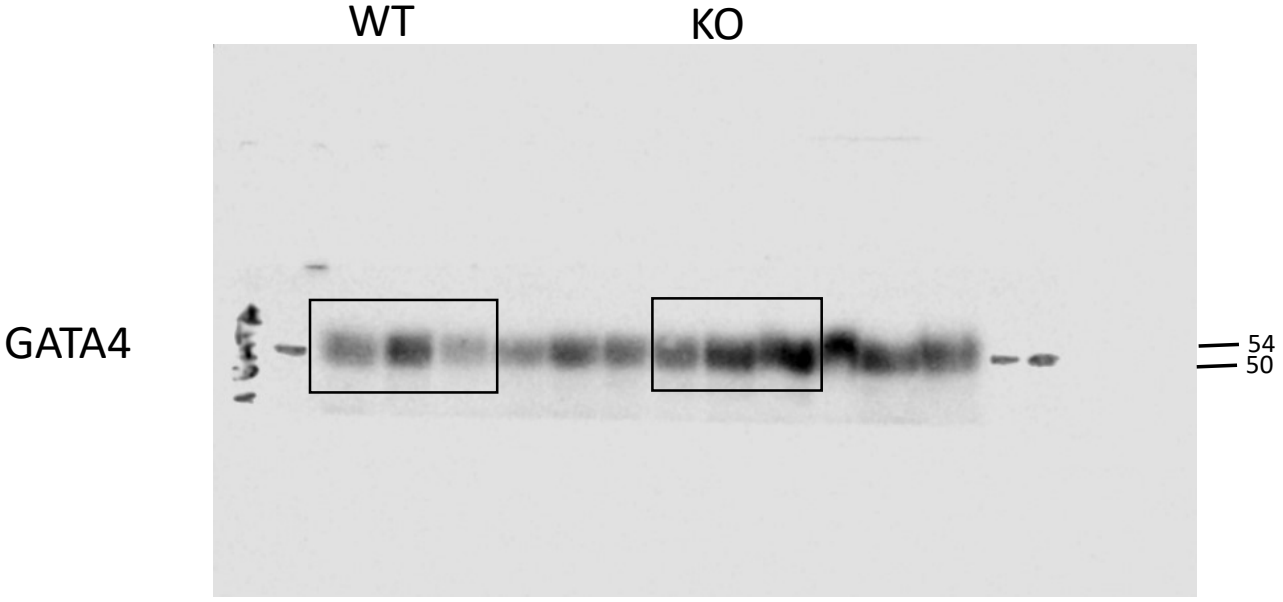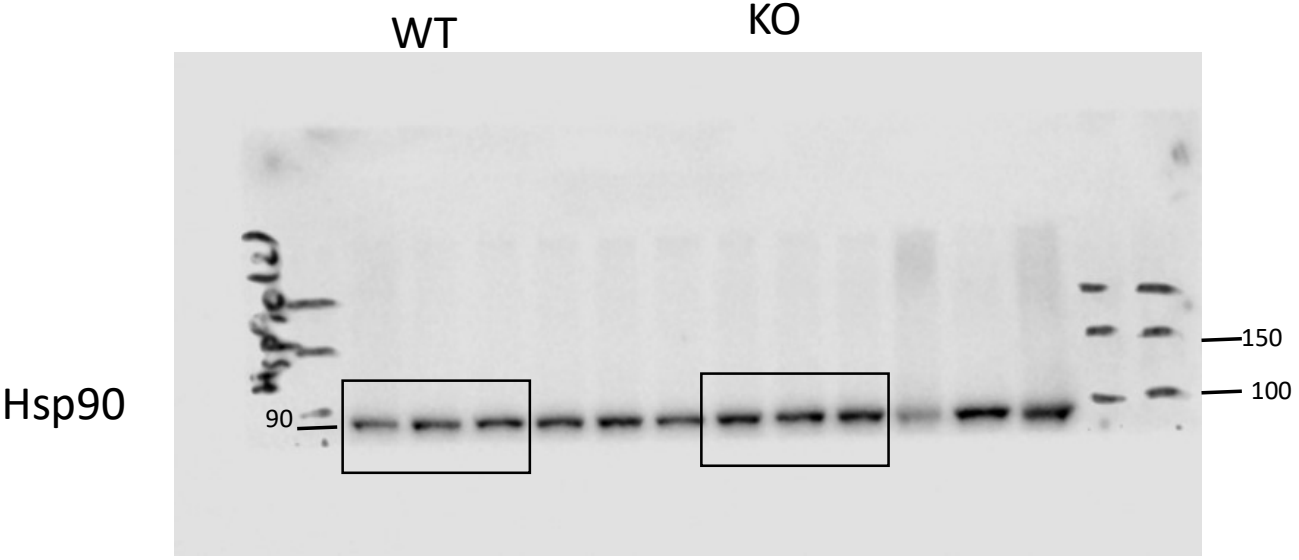

# Full unedited gel for Figure 7a

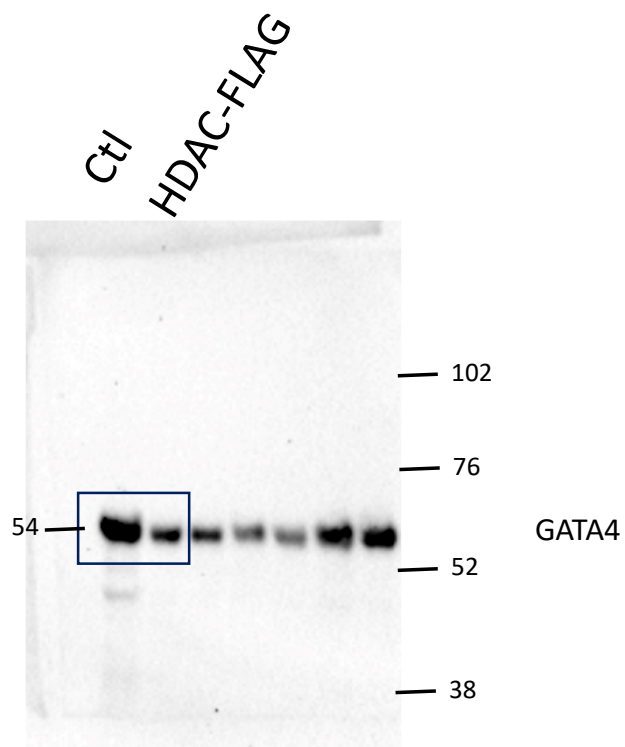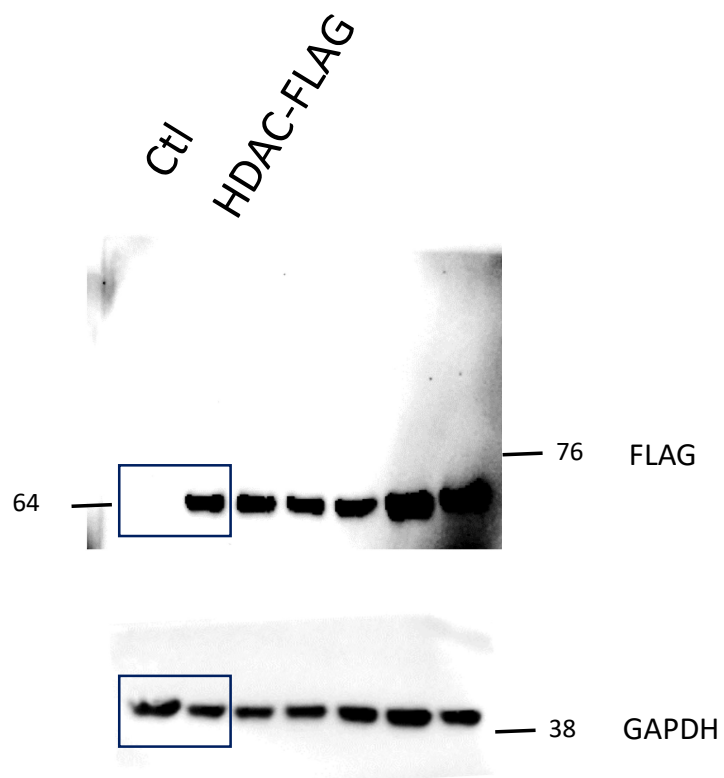

# Full unedited gel for Figure 7b

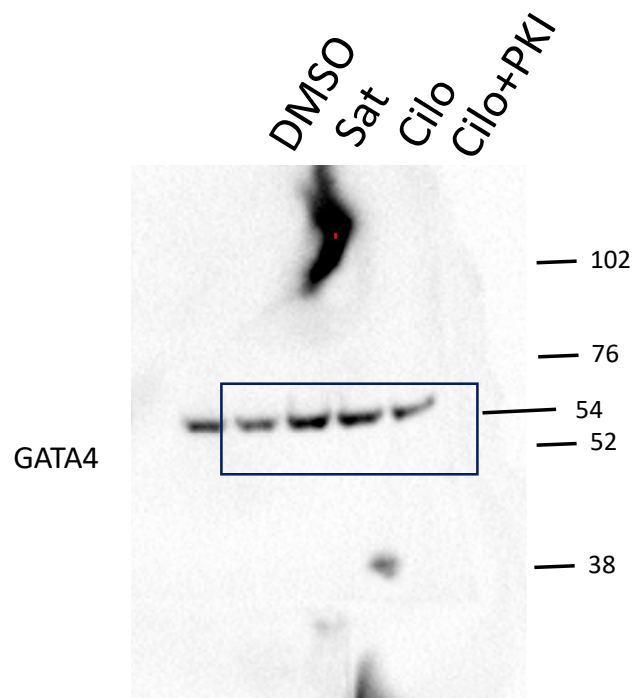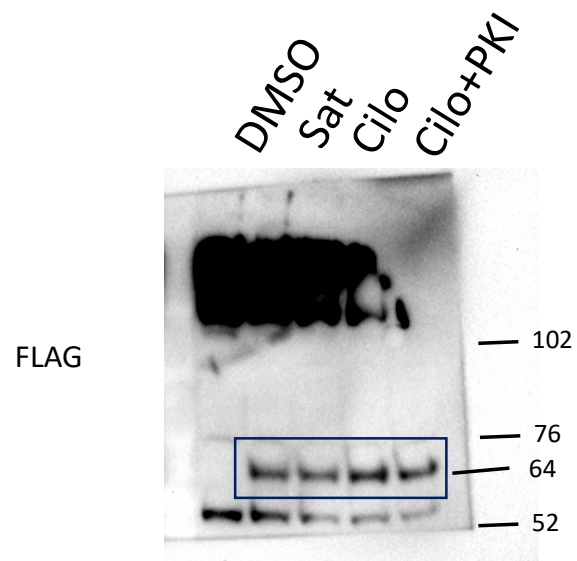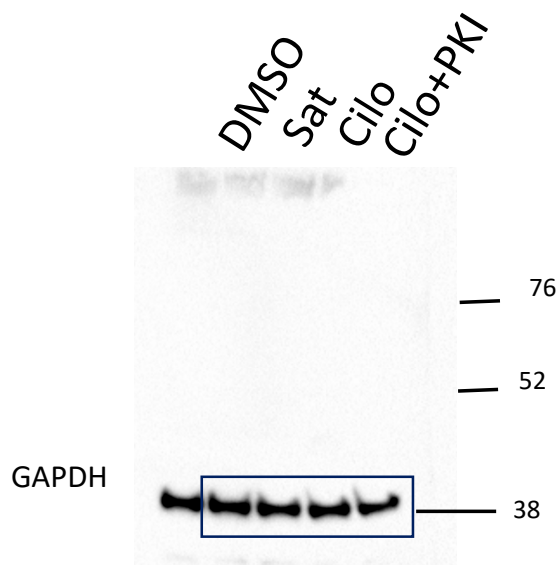

# Full unedited gel for Figure 7c

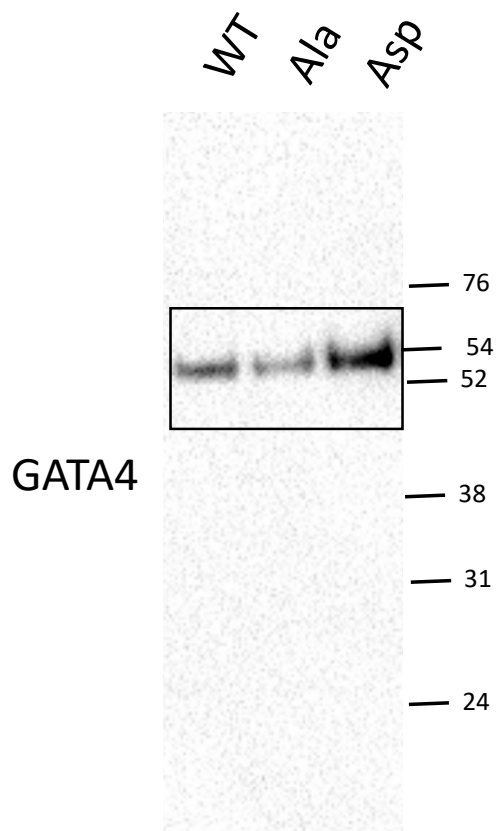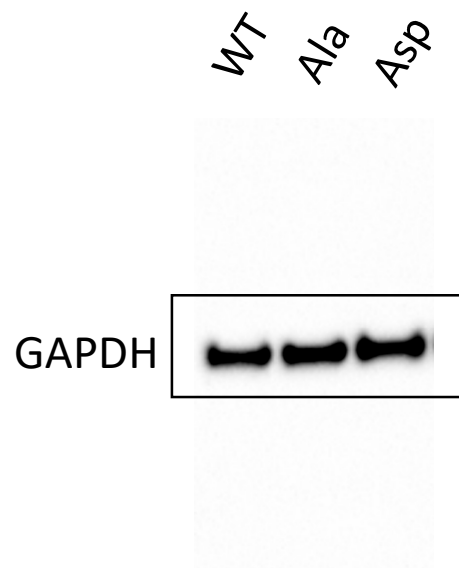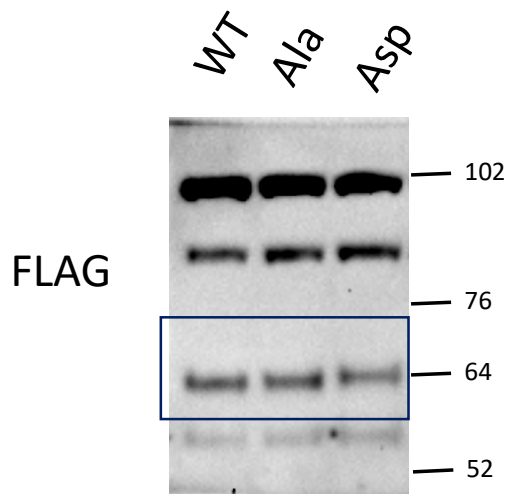

# Full unedited gel for Supplementary Figure 1b

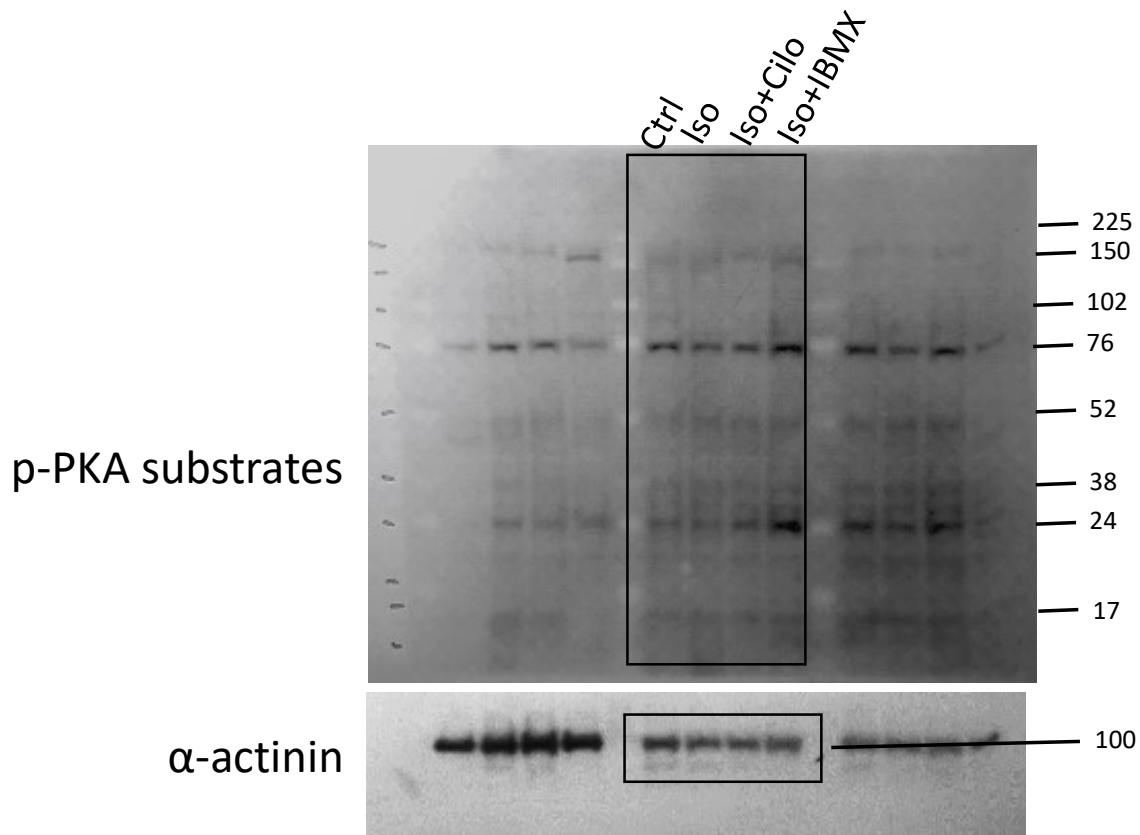

# Full unedited gel for Supplementary Figure 1d

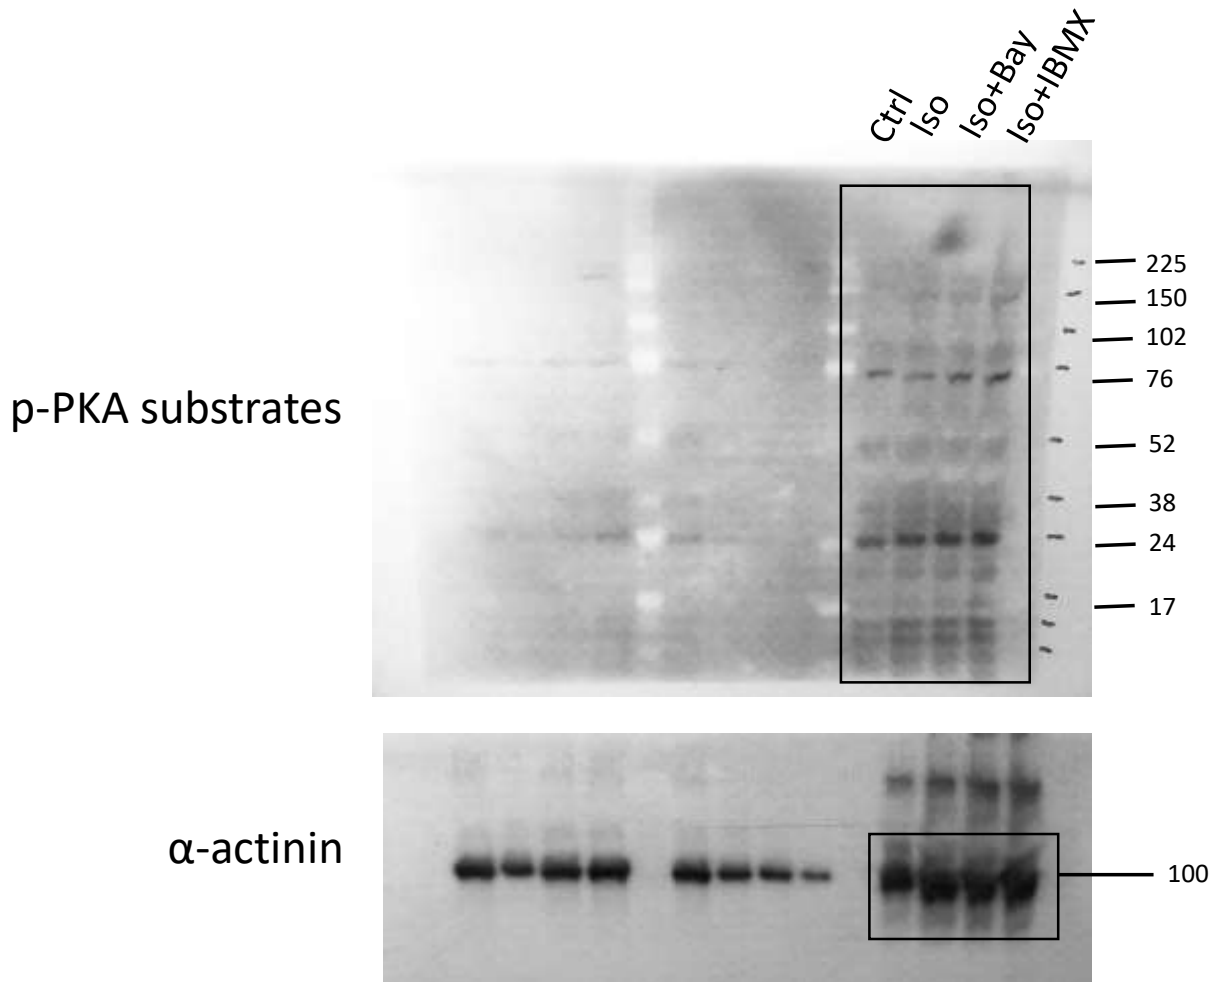

# Full unedited gel for supplementary Figure 8a

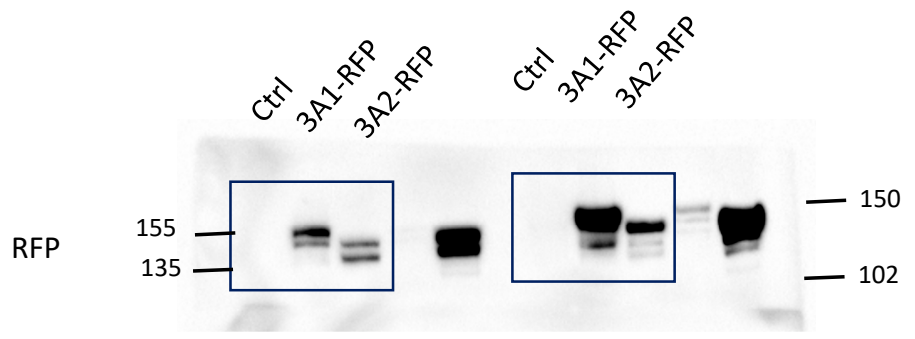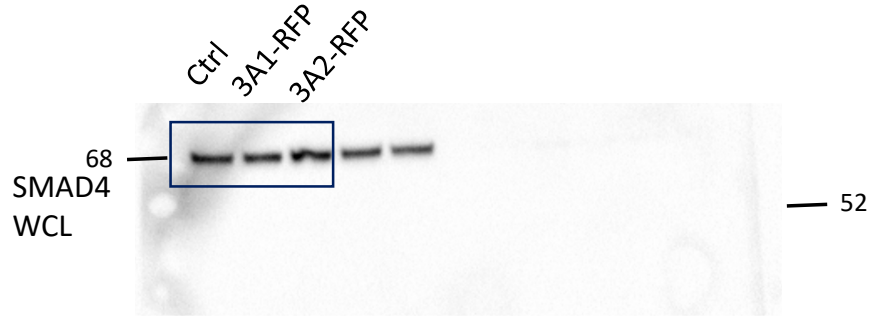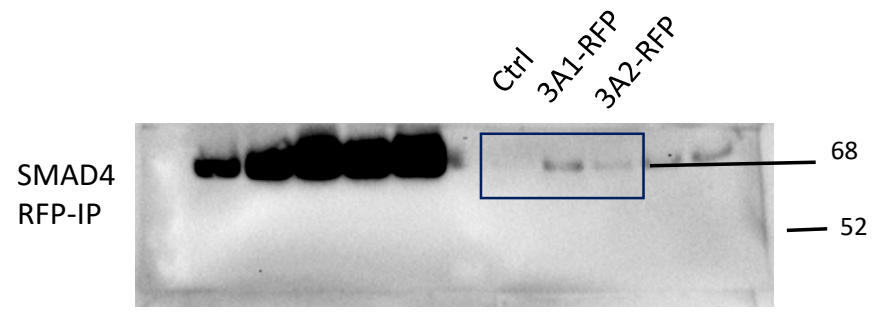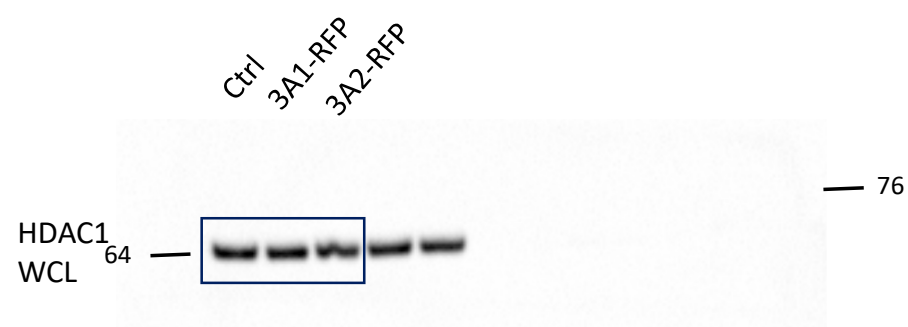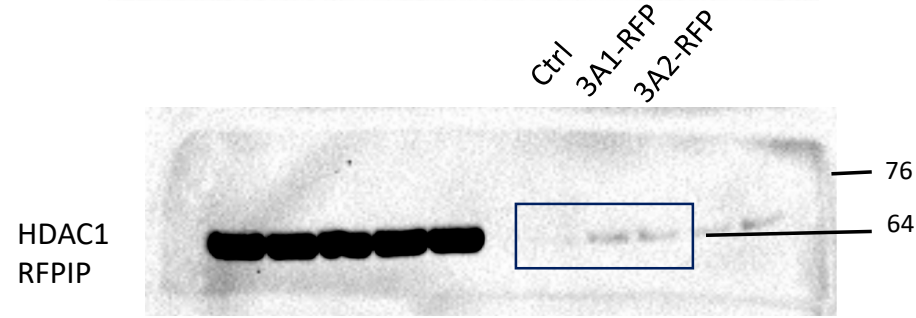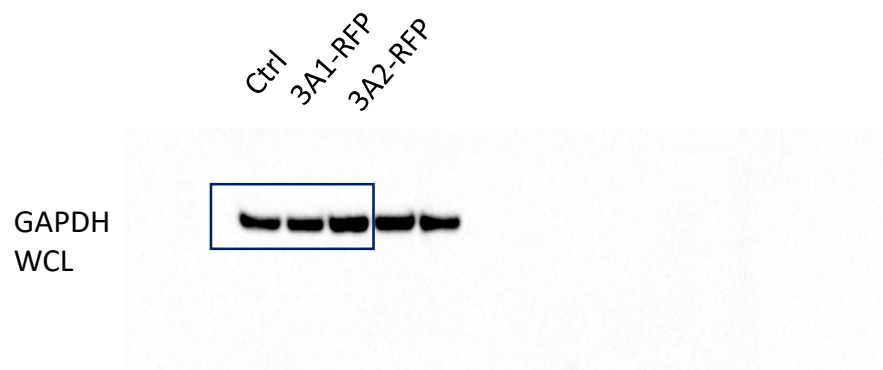

# Full unedited gel for supplementary Figure 8b

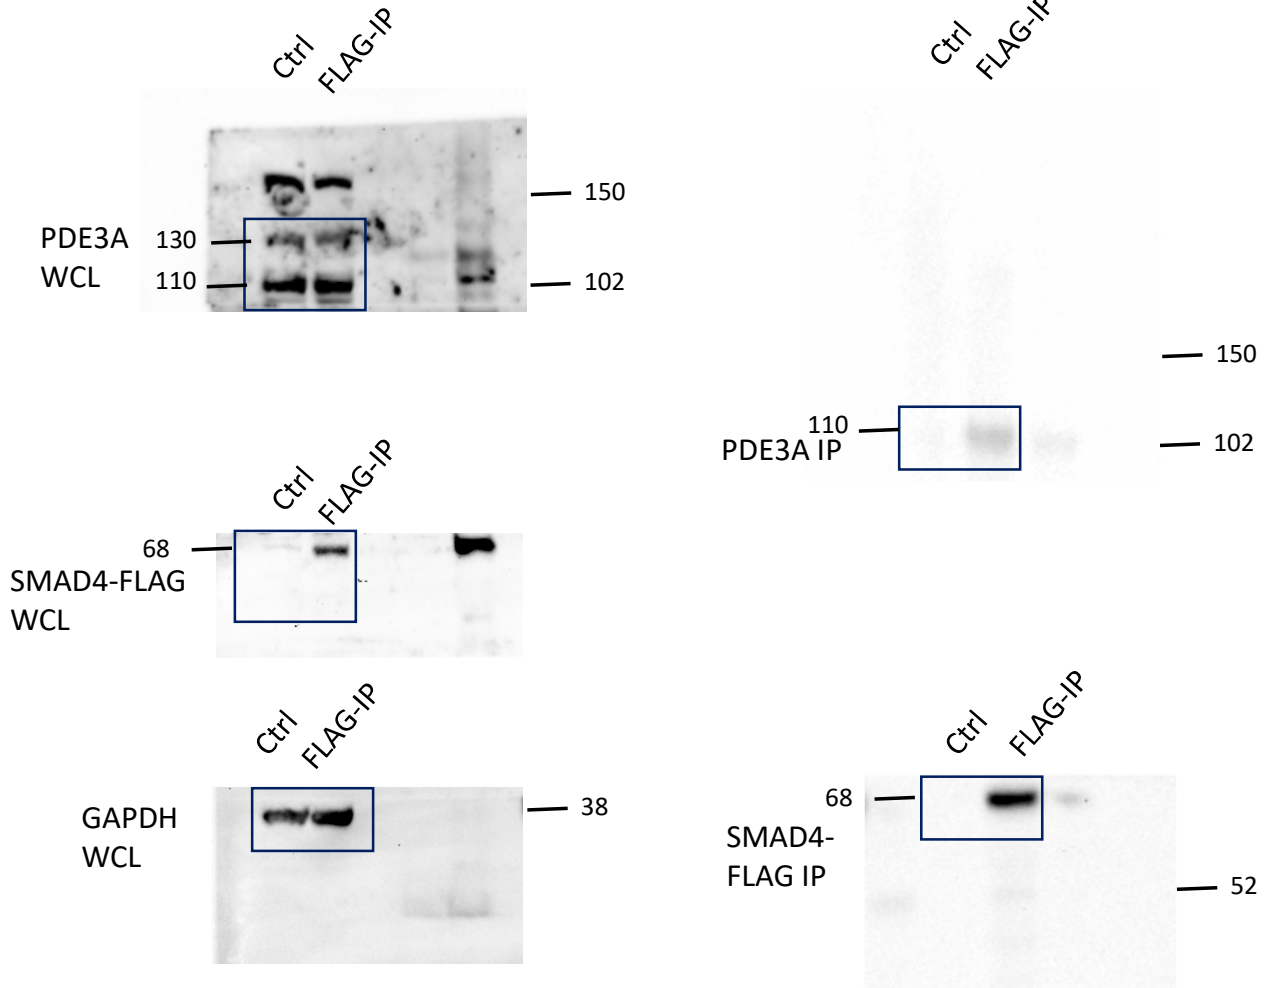



# Full unedited gel for Supplementary Figure 8C

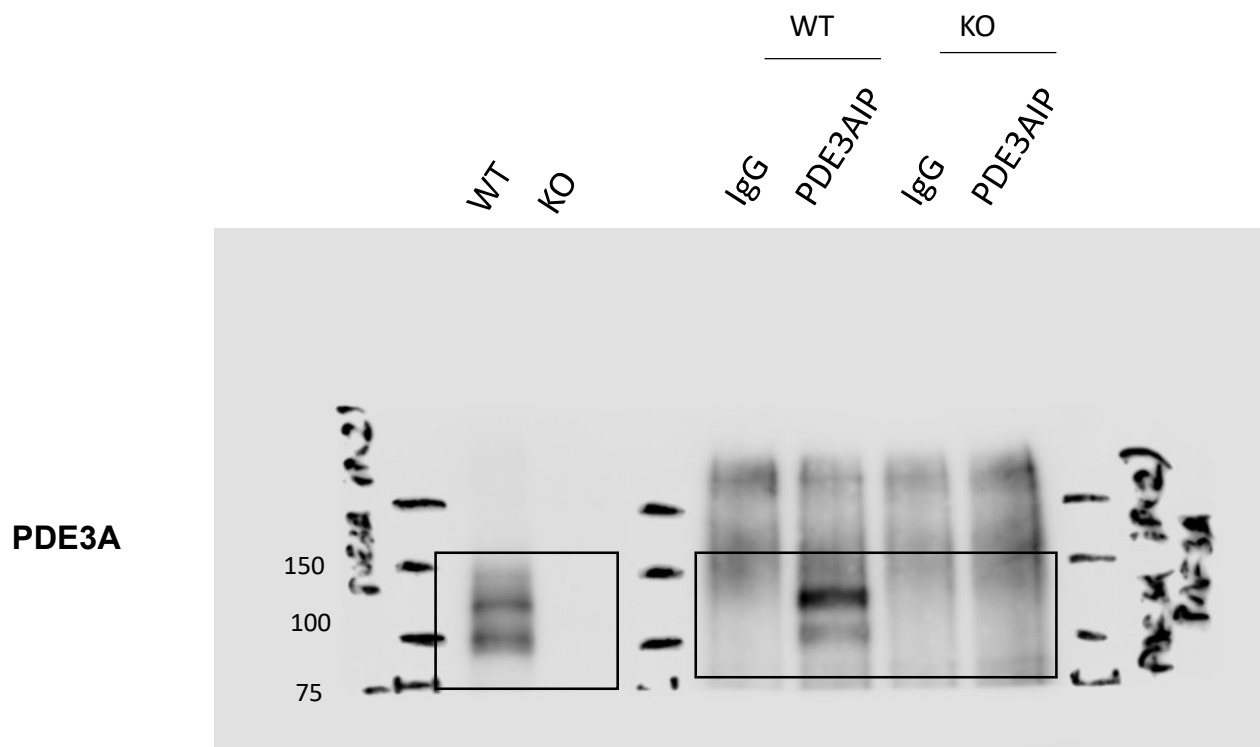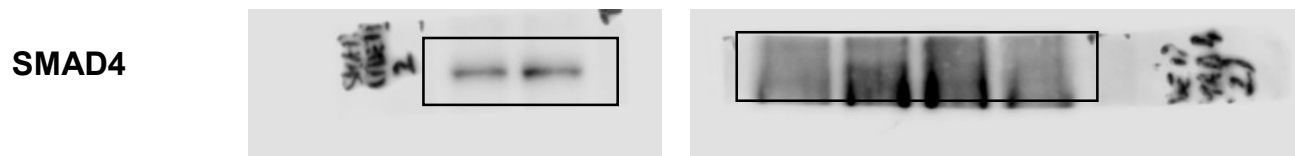

# Full unedited gel for Supplementary Figure 8d

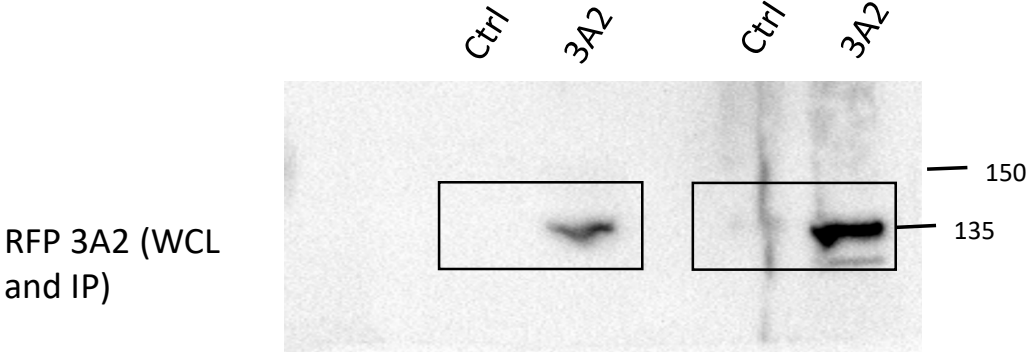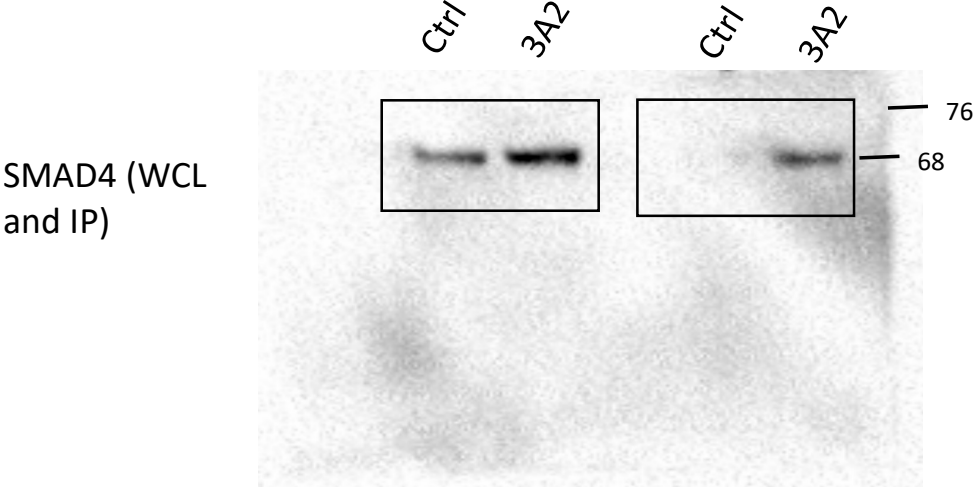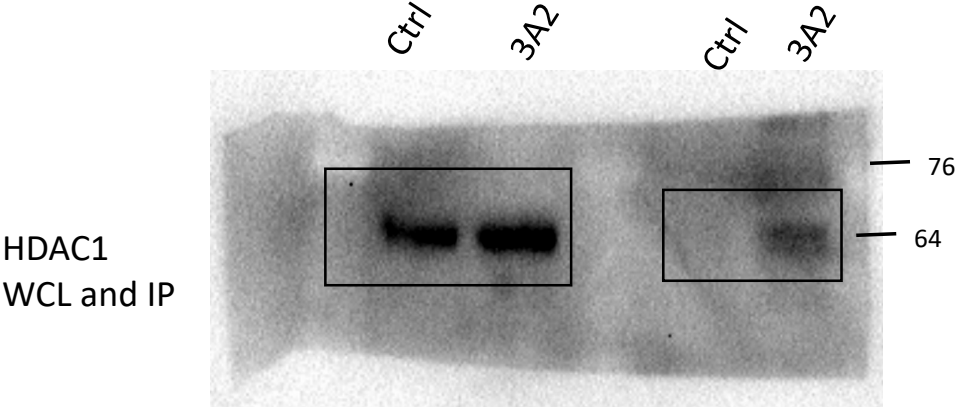

# Full unedited gel for Supplementary Figure 8e

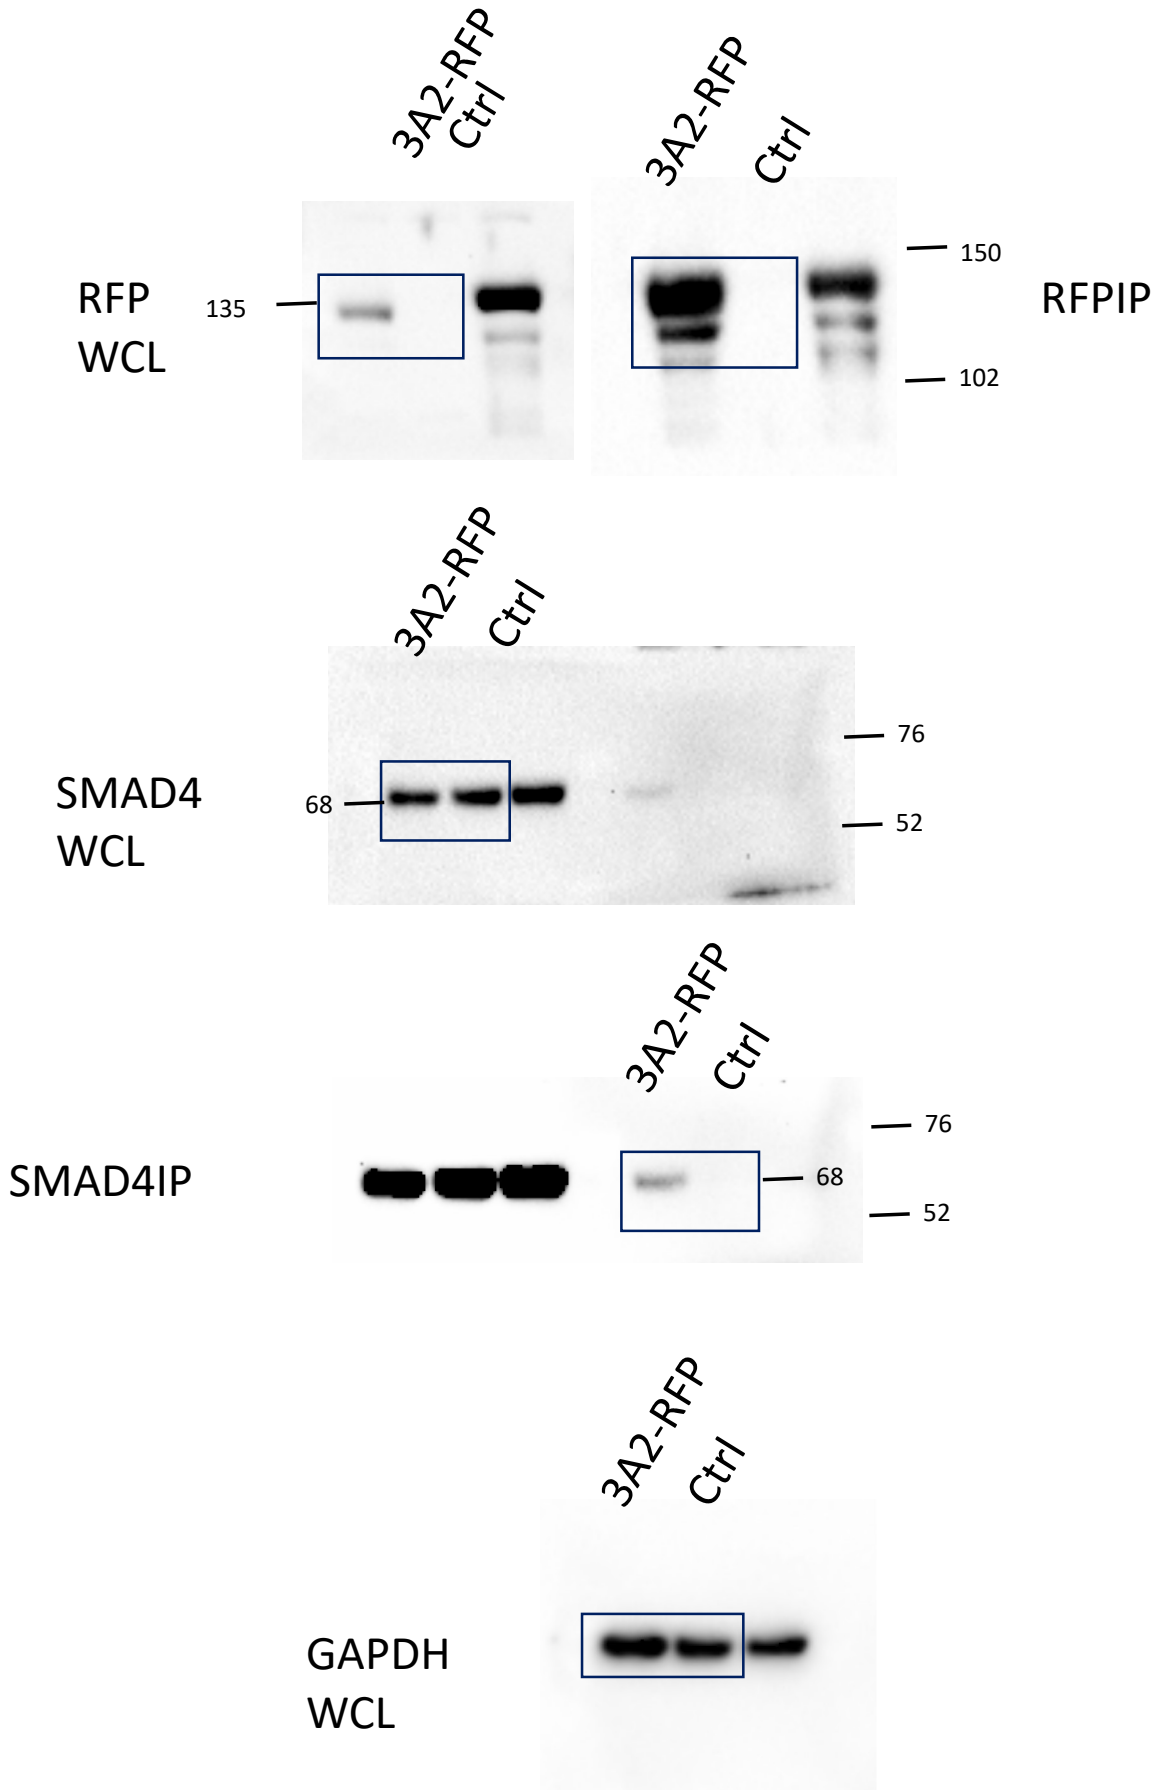

# Full unedited gel for Supplementary Figure 9

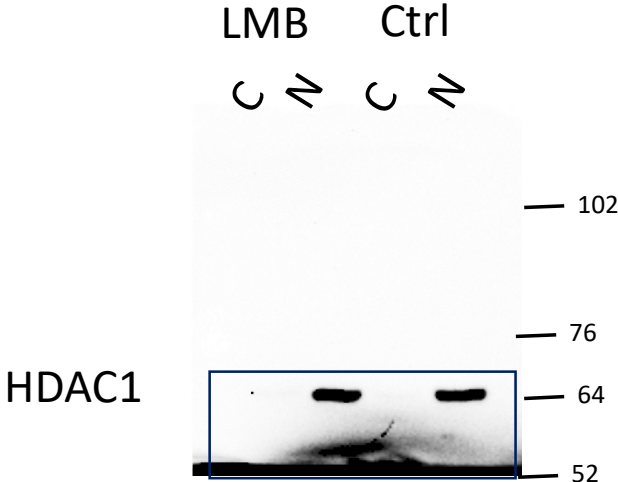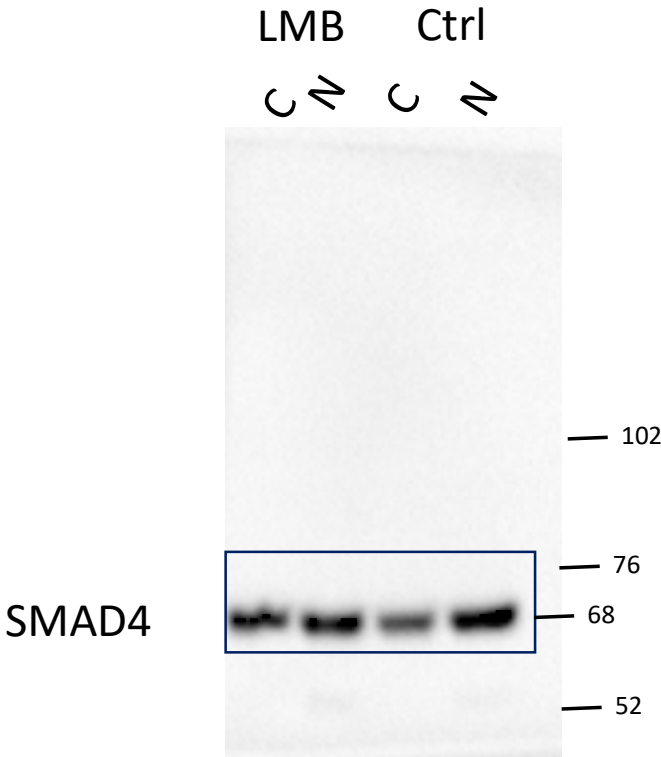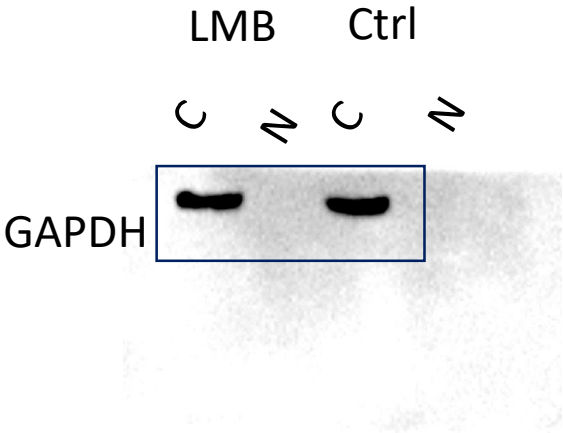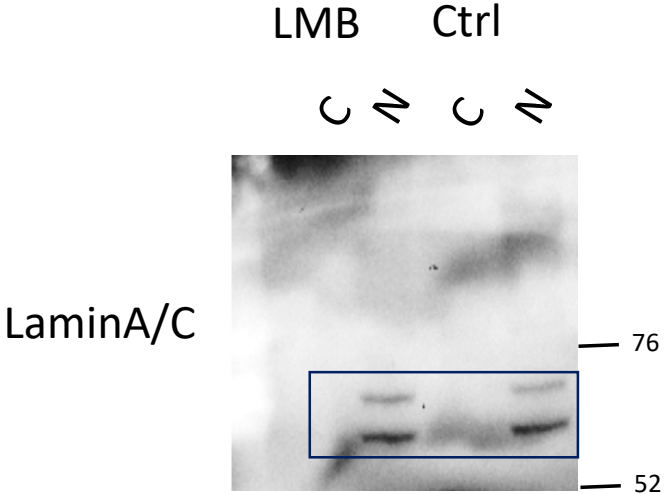

# Full unedited gel for Supplementary Figure 11a

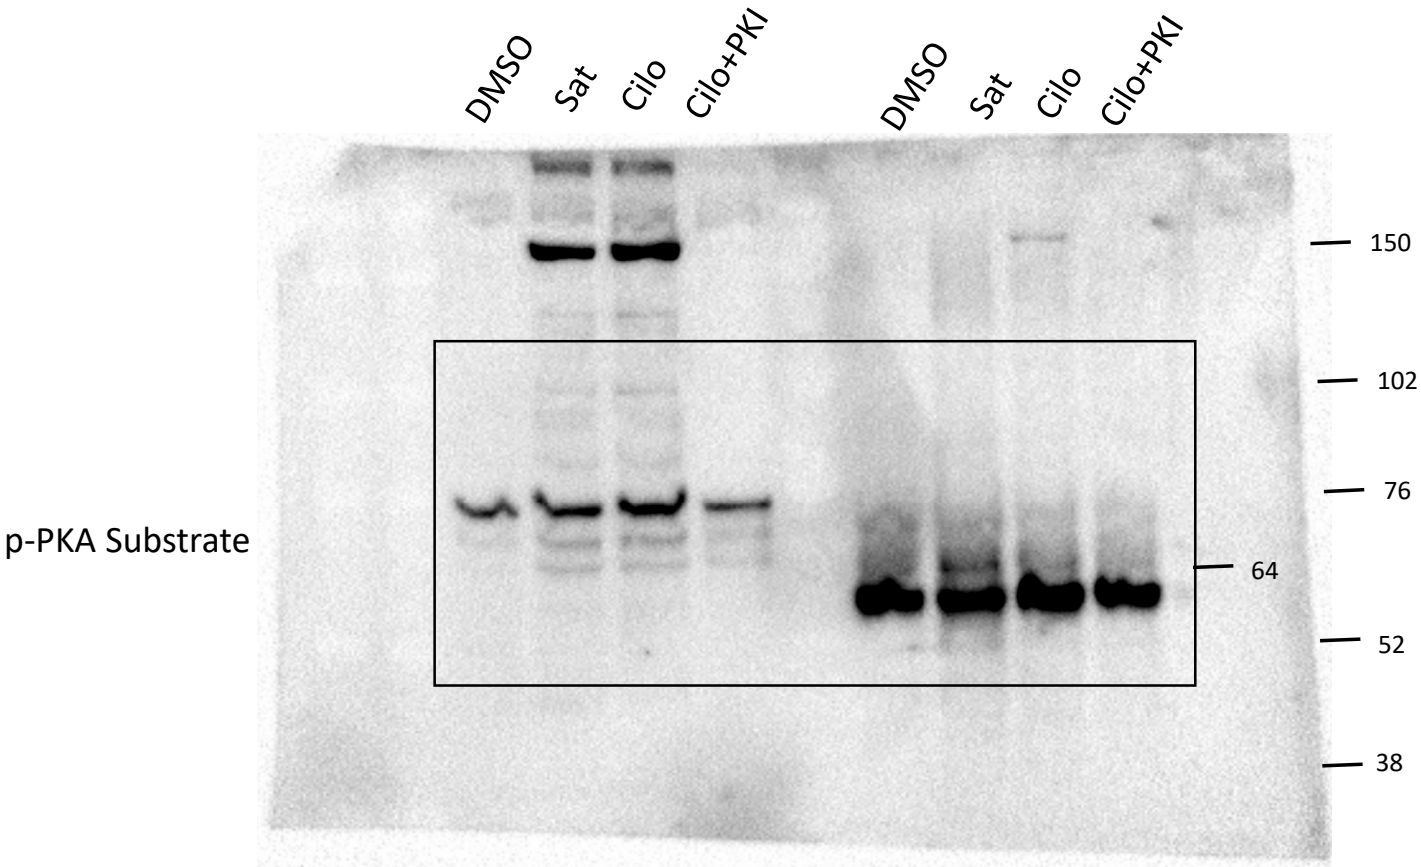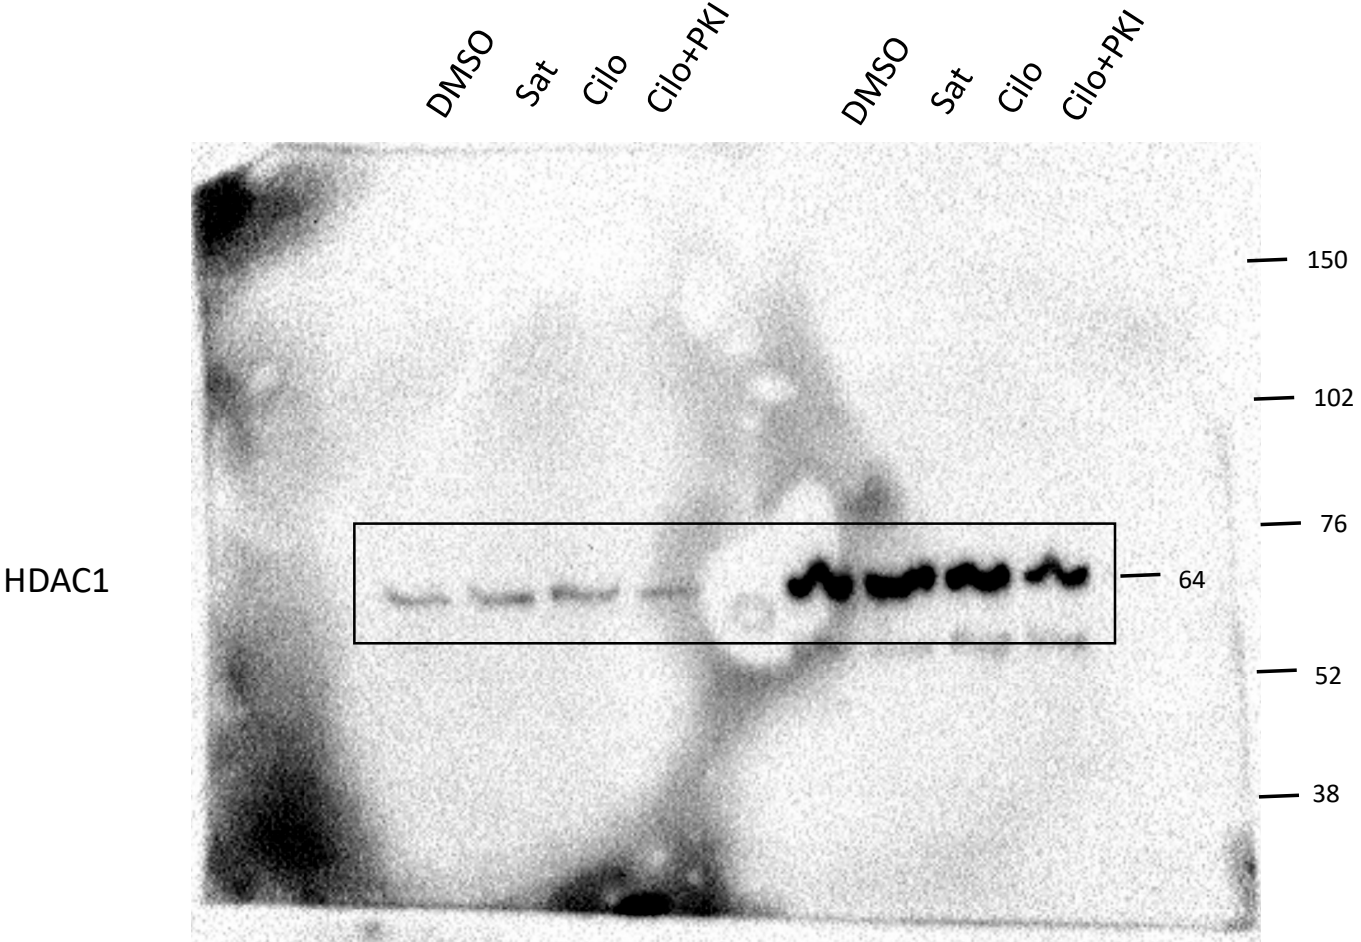

# Full unedited gel for Supplementary Figure 11b

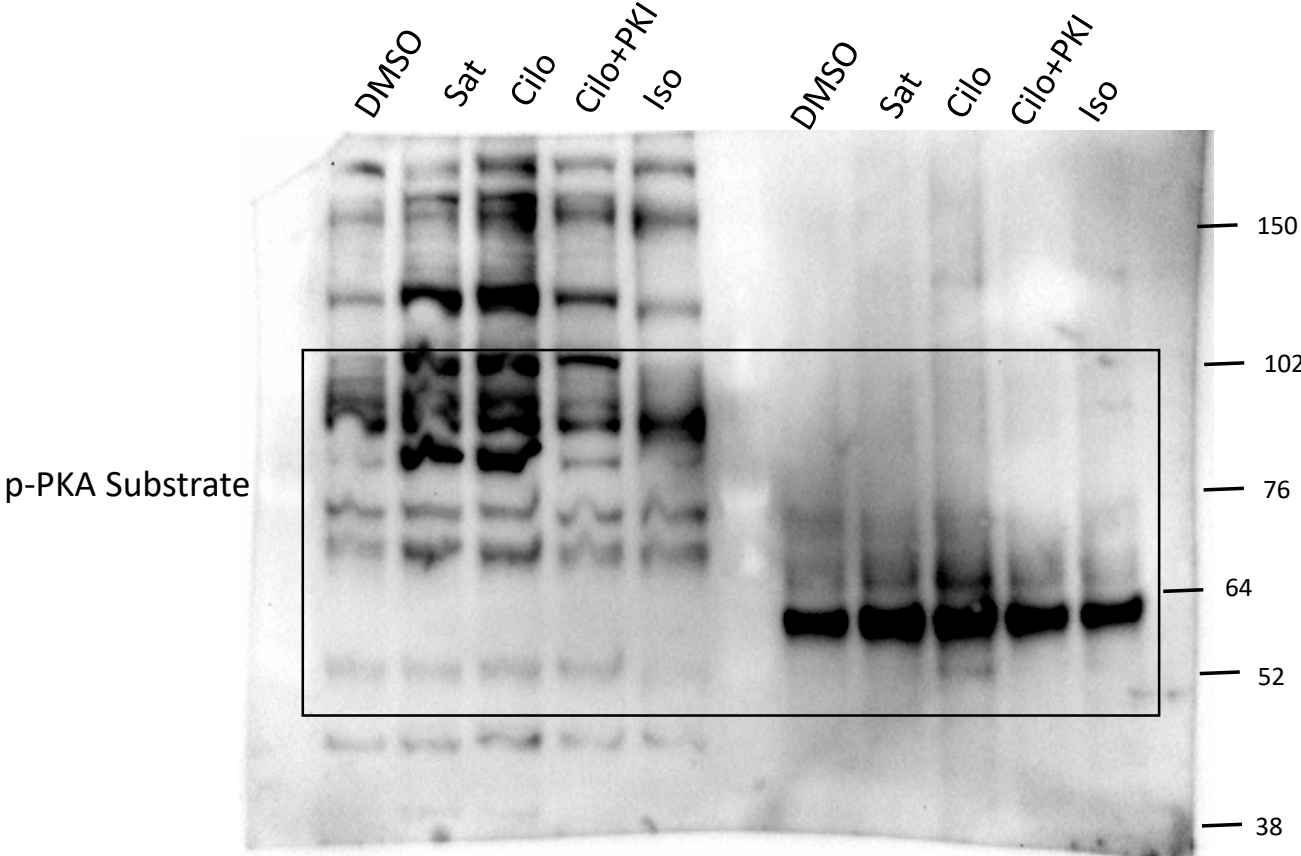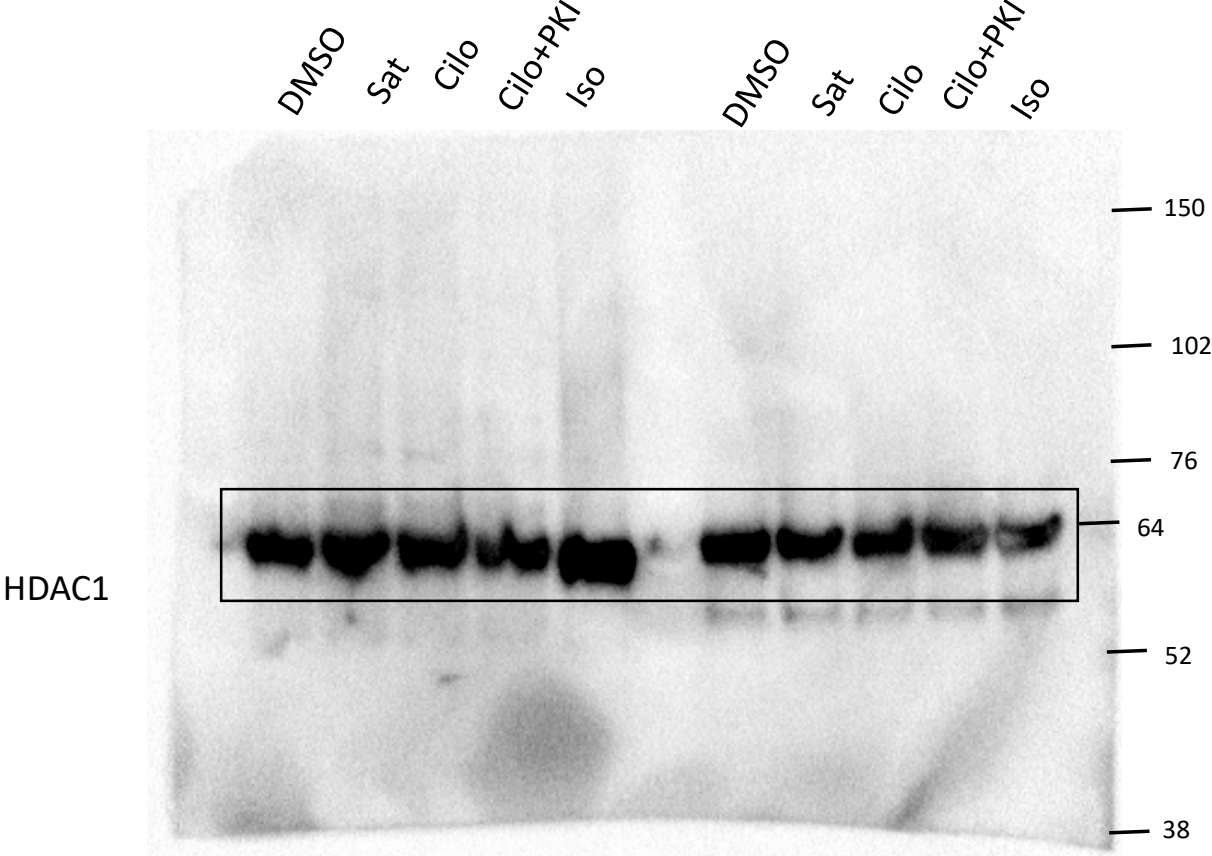

# Full unedited gel for Supplementary Figure 11c

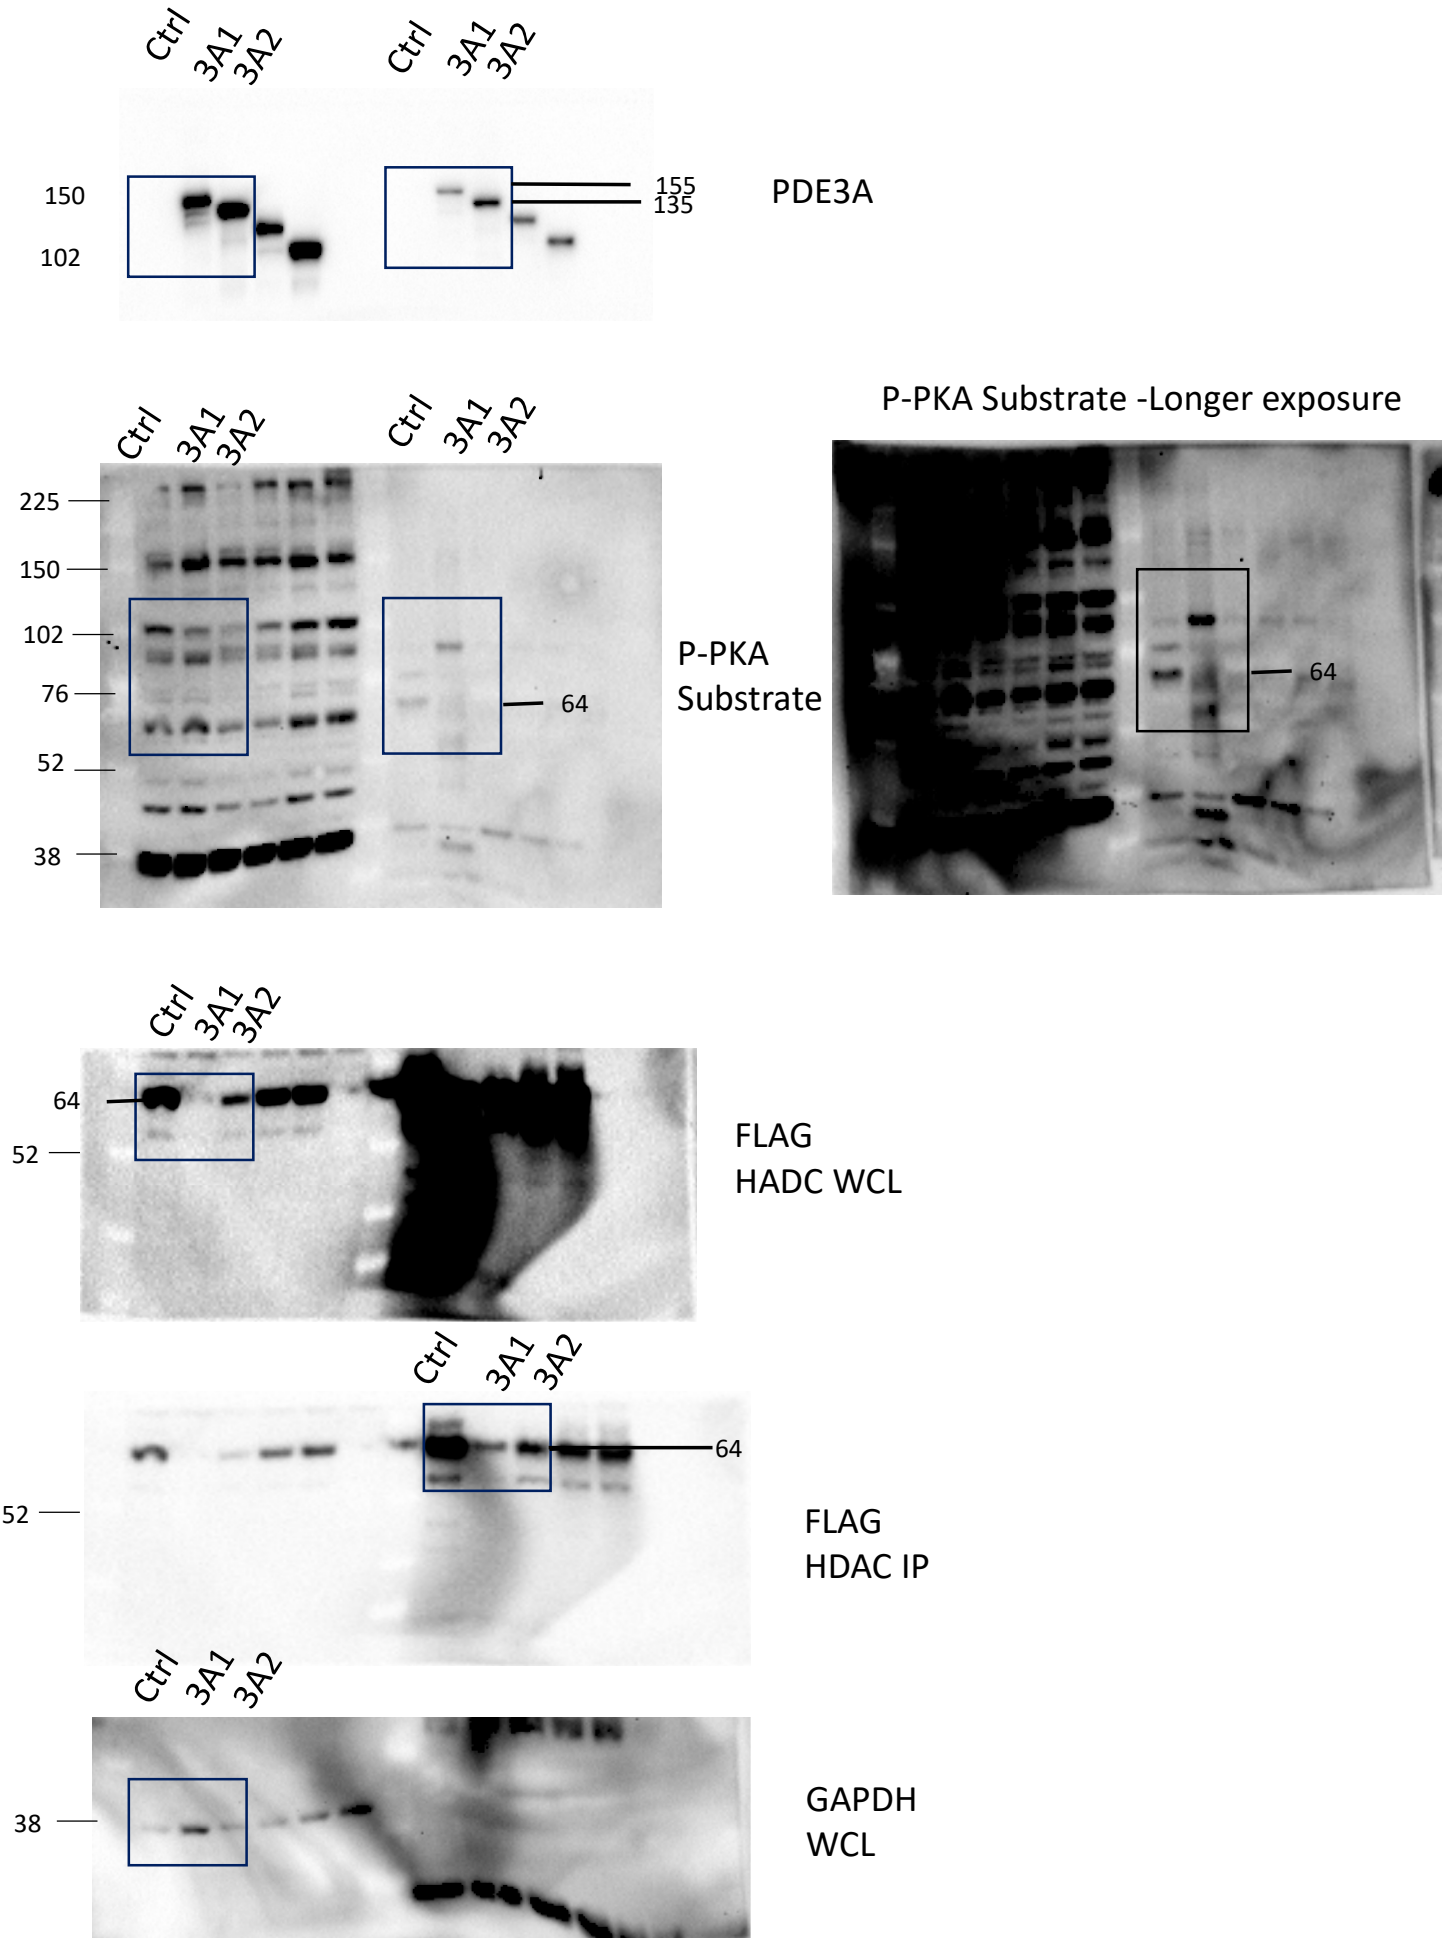

# Full unedited gel for Supplementary Figure 12

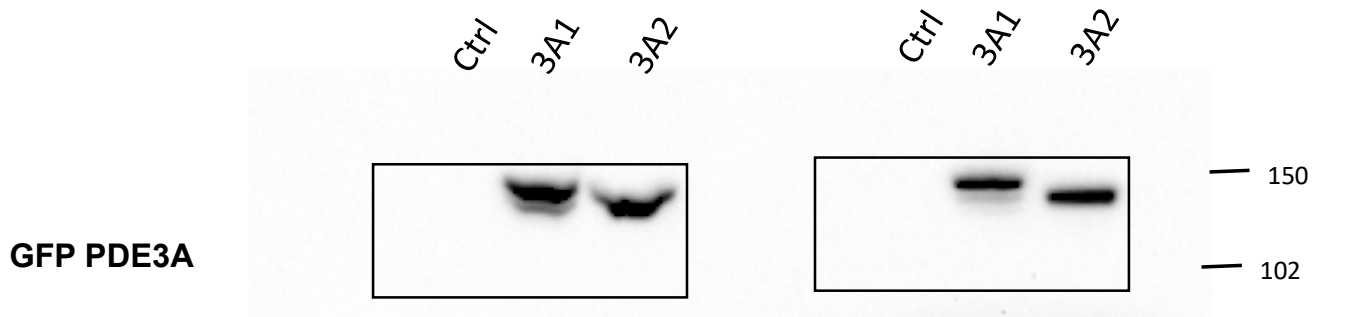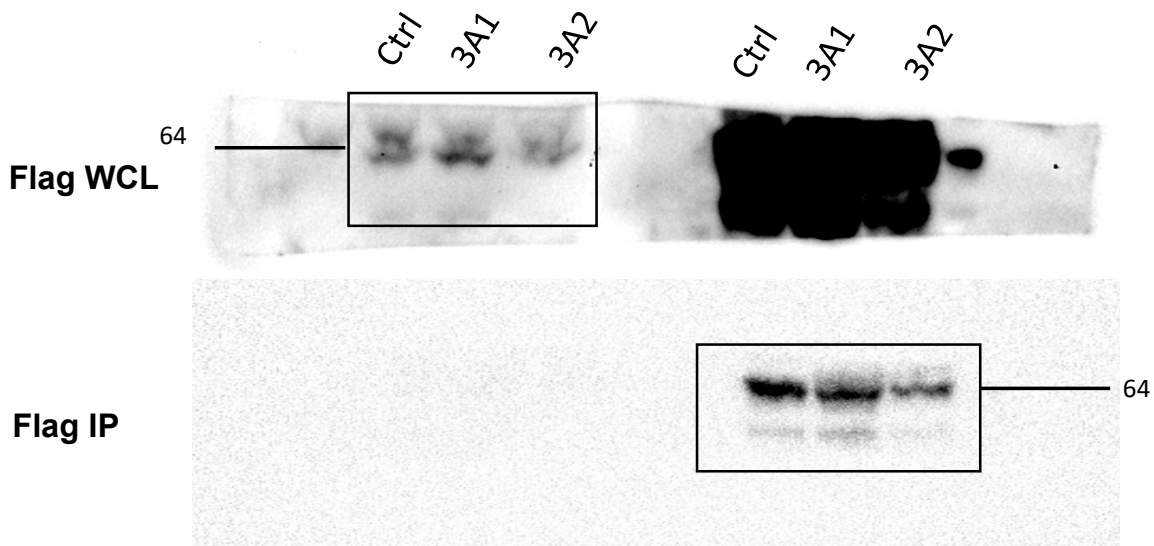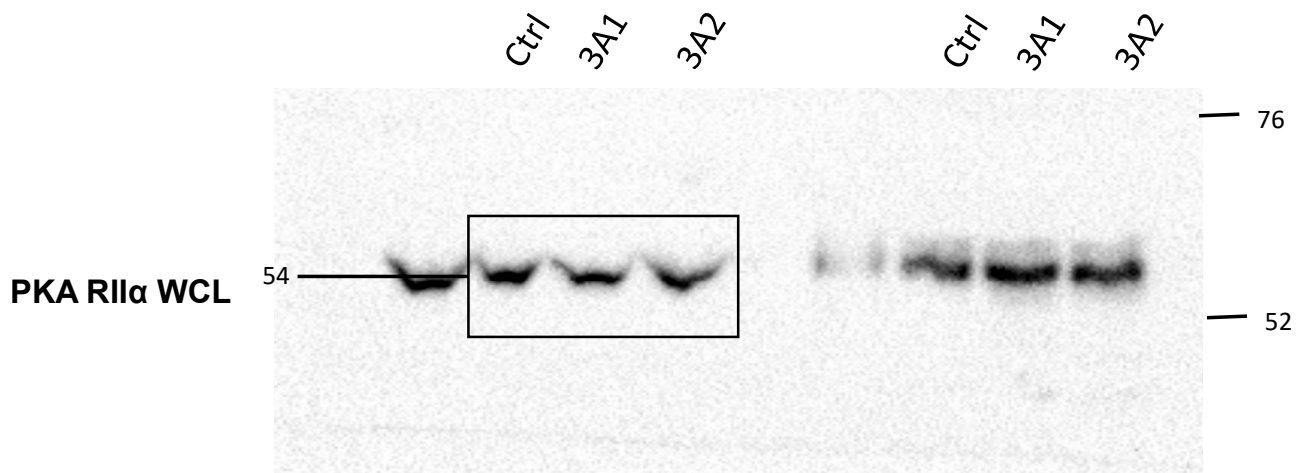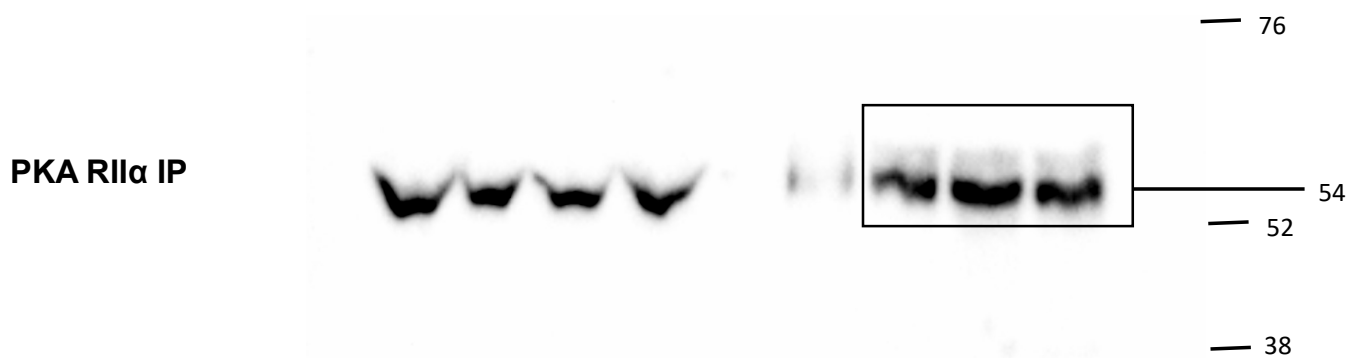



# Full unedited gel for Supplementary Figure 12

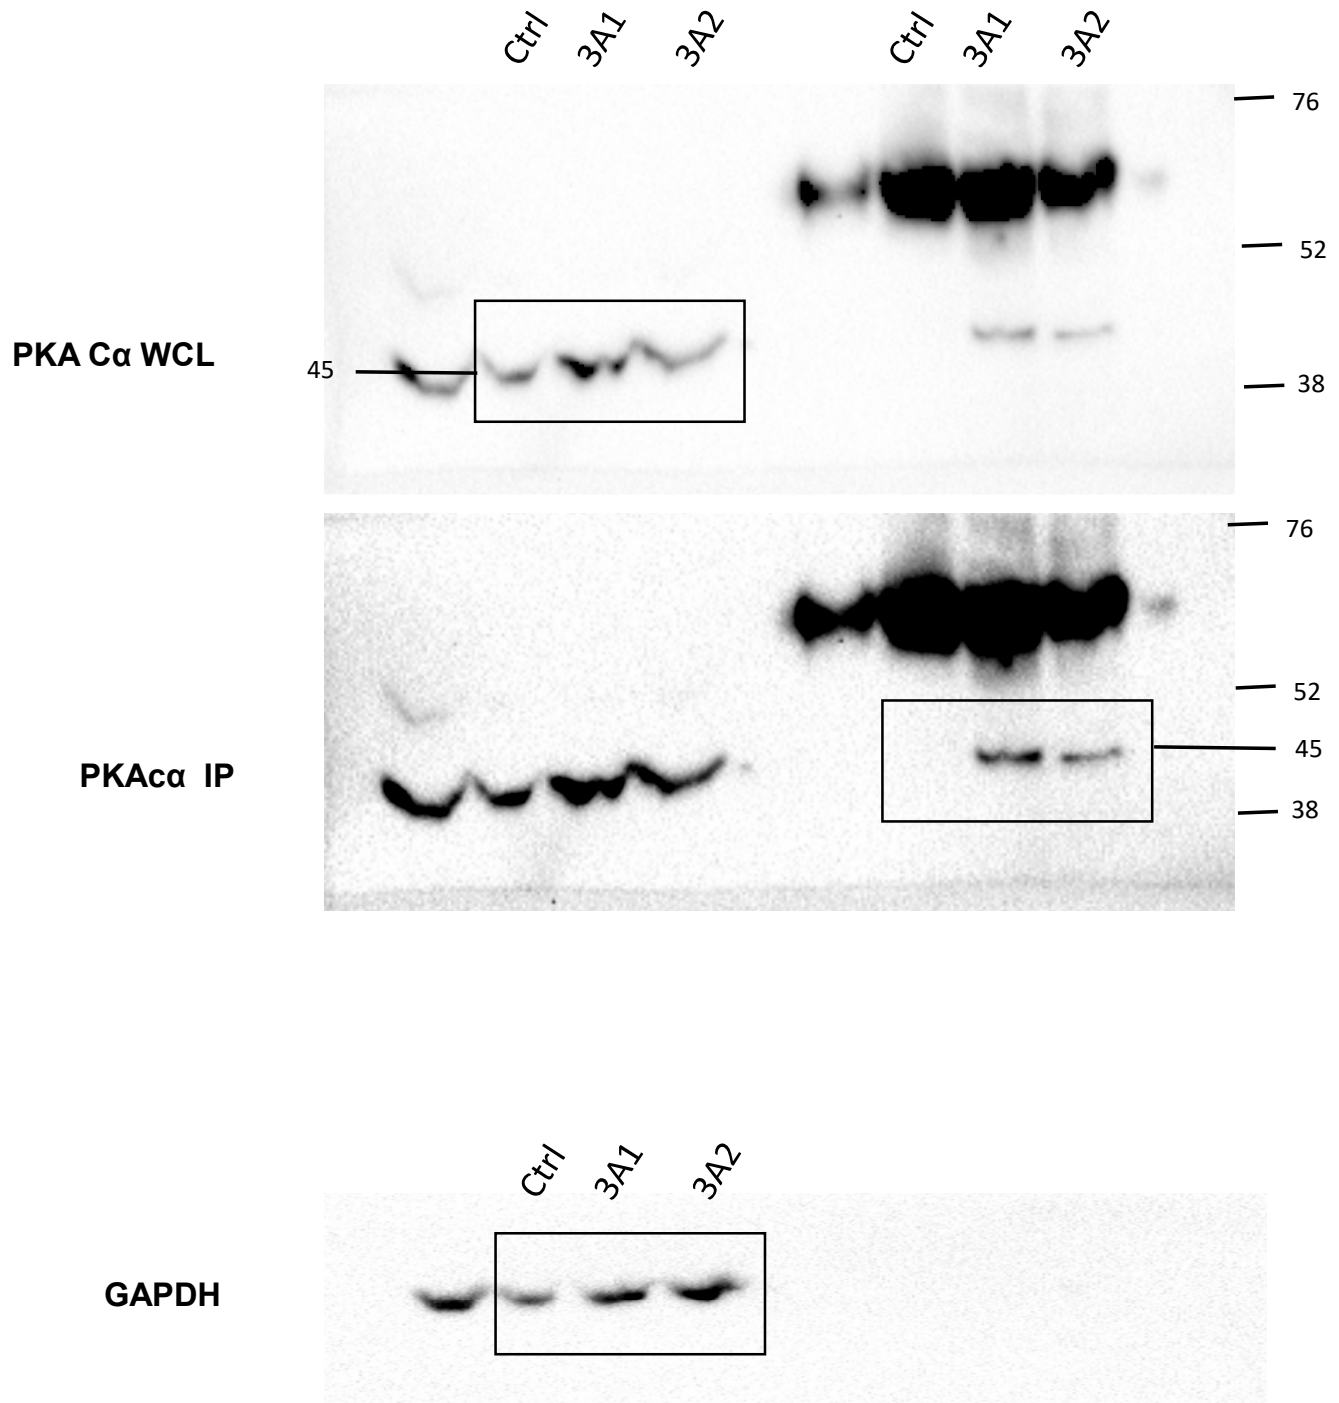

# Full unedited gel for Supplementary Figure 13a

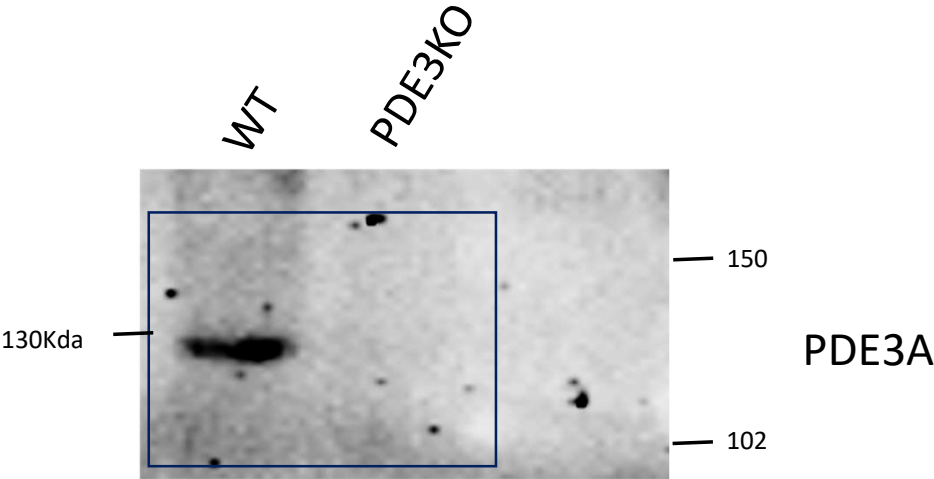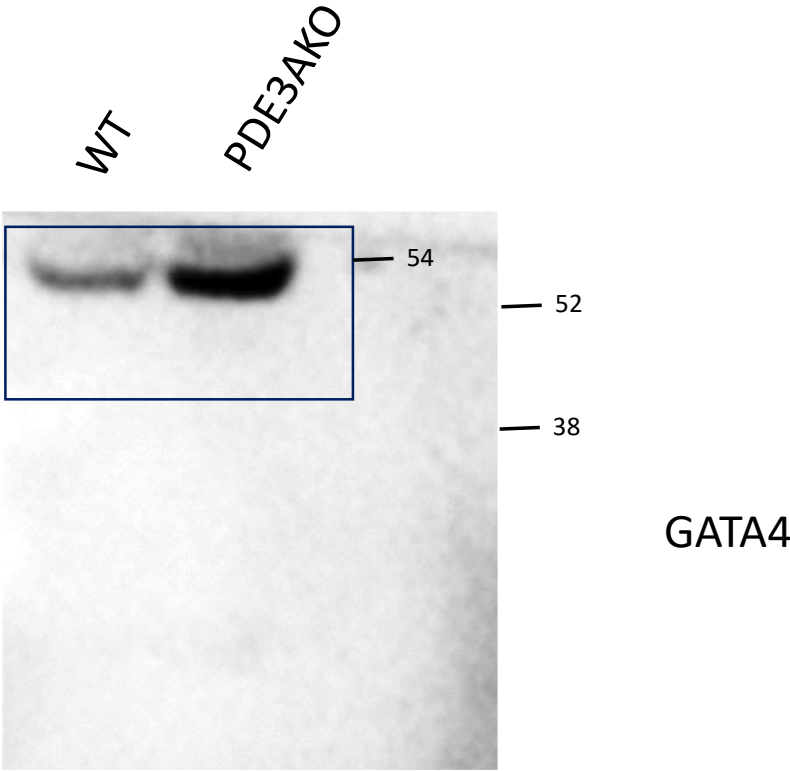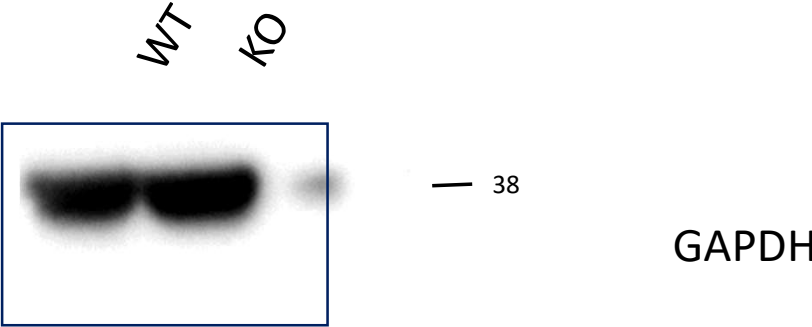

# Full unedited gel for Supplementary Figure 13e

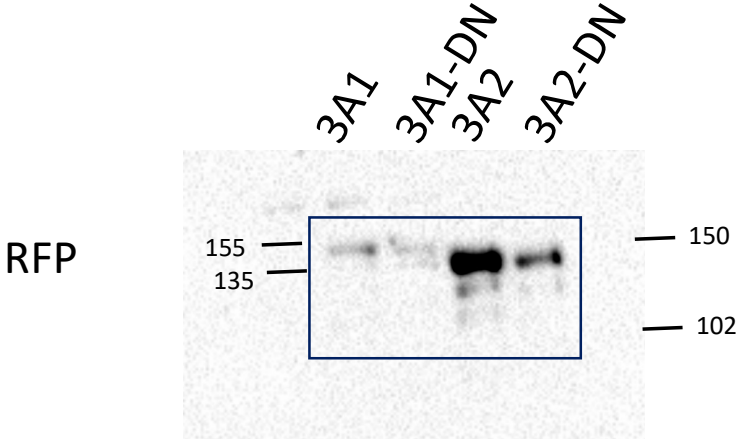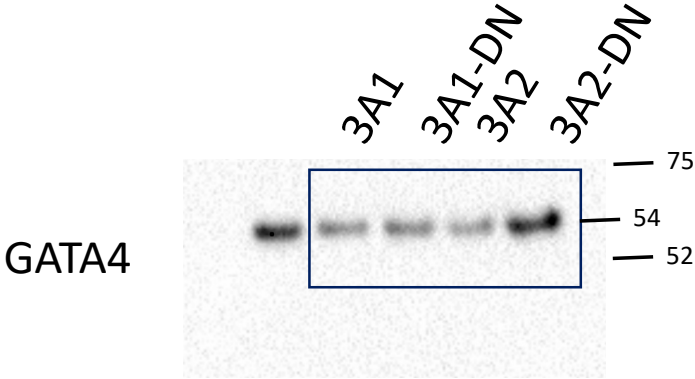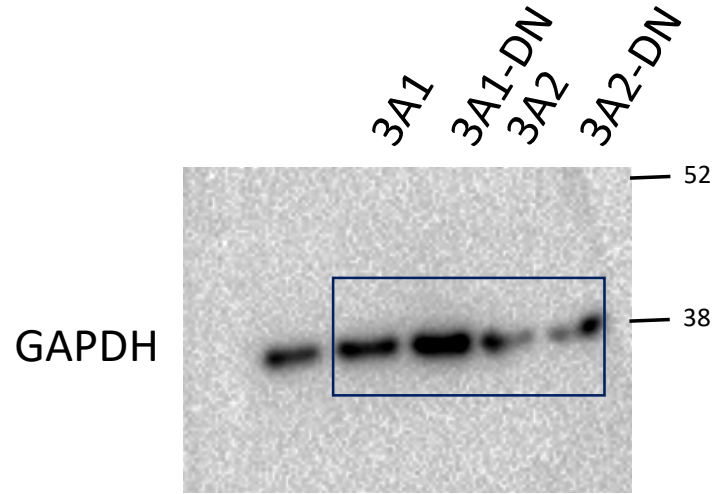

Supplement: res-132-828-s007.pdf [file res-132-828-s007.pdf]
