# Supplementary material for: Integrated Proteomics Unveils Nuclear PDE3A2 as a Regulator of Cardiac Myocyte Hypertrophy
Source: PubMed Central journal article supplement (PMC10045983; doi:10.1161/circresaha.122.321448), 2023-03-08
Supplement: res-132-828-s006.pdf [file res-132-828-s006.pdf]

## Major Resources Table

In order to allow validation and replication of experiments, all essential research materials listed in the Methods should be included in the Major Resources Table below. Authors are encouraged to use public repositories for protocols, data, code, and other materials and provide persistent identifiers and/or links to repositories when available. Authors may add or delete rows as needed.

### Animals (in vivo studies)

| Species           | Vendor or Source  | Background Strain | Sex  | Persistent ID / URL |
|-------------------|-------------------|-------------------|------|---------------------|
| Rattus norvegicus | In house breeding | WT                | Male | 13452               |
| Rattus norvegicus | In house breeding | WT                | Male | 13453               |
| Rattus norvegicus | In house breeding | WT                | Male | 13844               |
| Rattus norvegicus | In house breeding | WT                | Male | 13845               |
| Rattus norvegicus | In house breeding | WT                | Male | 13846               |
| Rattus norvegicus | In house breeding | WT                | Male | 18246               |
| Rattus norvegicus | In house breeding | WT                | Male | 18249               |
| Rattus norvegicus | In house breeding | WT                | Male | 13454               |
| Rattus norvegicus | In house breeding | WT                | Male | 13774               |
| Rattus norvegicus | In house breeding | WT                | Male | 18240               |
| Rattus norvegicus | In house breeding | WT                | Male | 18244               |
| Rattus norvegicus | In house breeding | WT                | Male | 14315               |
| Rattus norvegicus | In house breeding | KO                | Male | 14024               |
| Rattus norvegicus | In house breeding | KO                | Male | 14242               |
| Rattus norvegicus | In house breeding | KO                | Male | 18212               |
| Rattus norvegicus | In house breeding | KO                | Male | 18238               |
| Rattus norvegicus | In house breeding | KO                | Male | 16991               |
| Rattus norvegicus | In house breeding | KO                | Male | 16999               |
| Rattus norvegicus | In house breeding | KO                | Male | 14245               |
| Rattus norvegicus | In house breeding | KO                | Male | 18204               |
| Rattus norvegicus | In house breeding | KO                | Male | 18233               |
| Rattus norvegicus | In house breeding | KO                | Male | 14244               |
| Rattus norvegicus | In house breeding | KO                | Male | 14245               |
| Rattus norvegicus | In house breeding | WT                | Male | 15392               |
| Rattus norvegicus | In house breeding | WT                | Male | 18274               |
| Rattus norvegicus | In house breeding | WT                | Male | 15403               |
| Rattus norvegicus | In house breeding | WT                | Male | 22958               |
| Rattus norvegicus | In house breeding | WT                | Male | 22654               |
| Rattus norvegicus | In house breeding | WT                | Male | 22962               |
| Rattus norvegicus | In house breeding | WT                | Male | 23017               |
| Rattus norvegicus | In house breeding | KO                | Male | 19677               |
| Rattus norvegicus | In house breeding | KO                | Male | 19672               |
| Rattus norvegicus | In house breeding | KO                | Male | 19916               |
| Rattus norvegicus | In house breeding | KO                | Male | 00350               |
| Rattus norvegicus | In house breeding | KO                | Male | 00351               |
| Rattus norvegicus | In house breeding | KO                | Male | 00352               |
| Rattus norvegicus | In house breeding | KO                | Male | 00353               |

We are aware that physiological and pathophysiological processes in the bodies of humans and animals may be sex-dependent. Such sex-dependent differences in severity and symptomatology have also been observed in cardiovascular patients and in animal models. However, for this experiment we have chosen to initially select only male animals because

male animals usually react more sensitively with blood pressure increases than female animals, which can be protected from blood pressure increases by their sex hormones.

In future experiments, we will also use female animals to confirm that our findings are sex-independent.

Another reason for limiting the experiments to the use of males was German animal legislation, which is particularly restrictive in Berlin, and authorities enforce that scientists carry out animal experiments with as few animals as possible.

## Antibodies

| Target antigen                | Vendor or Source | Catalog #     | Working concentration | Persistent ID / URL                                                                                                                                                                                                                                                                                                                                                                     |
|-------------------------------|------------------|---------------|-----------------------|-----------------------------------------------------------------------------------------------------------------------------------------------------------------------------------------------------------------------------------------------------------------------------------------------------------------------------------------------------------------------------------------|
| PDE3A                         | Bethyl lab       | A302-740A     | 1:1000                | <a href="https://www.fortislife.com/search?query=pde3a&amp;pageSize=15">https://www.fortislife.com/search?query=pde3a&amp;pageSize=15</a>                                                                                                                                                                                                                                               |
| PDE3A                         | Santacruz        | SC 293446     | 1:20                  | <a href="https://www.scbt.com/p/pde3a-antibody-2d7">https://www.scbt.com/p/pde3a-antibody-2d7</a>                                                                                                                                                                                                                                                                                       |
| PDE3A                         | Novusbio         | H00005139-M03 | 1:50                  | <a href="https://www.novusbio.com/products/pde3a-antibody-2d7_h00005139-m03">https://www.novusbio.com/products/pde3a-antibody-2d7_h00005139-m03</a>                                                                                                                                                                                                                                     |
| Flag                          | Sigma            | F7425         | 1:2000                | <a href="https://www.sigmaaldrich.com/GB/en/product/sigma/f7425">https://www.sigmaaldrich.com/GB/en/product/sigma/f7425</a>                                                                                                                                                                                                                                                             |
| GAPDH                         | ProteinTech      | 60004-1-1g    | 1:5000                | <a href="https://www.ptglab.com/products/GAPDH-Antibody-60004-1-1g.htm">https://www.ptglab.com/products/GAPDH-Antibody-60004-1-1g.htm</a>                                                                                                                                                                                                                                               |
| phosphoPKA substrate antibody | Cell signaling   | 9621S         | 1:1000                | <a href="https://www.cellsignal.com/products/primary-antibodies/phospho-ser-thr-pka-substrate-antibody/9621">https://www.cellsignal.com/products/primary-antibodies/phospho-ser-thr-pka-substrate-antibody/9621</a>                                                                                                                                                                     |
| phosphoPKA substrate antibody | Cell Signalling  | 9624          | 1:1000                | <a href="https://www.cellsignal.com/products/primary-antibodies/phospho-pka-substrate-rxrs-t-100g7e-rabbit-mab/9624">https://www.cellsignal.com/products/primary-antibodies/phospho-pka-substrate-rxrs-t-100g7e-rabbit-mab/9624</a>                                                                                                                                                     |
| SMAD4                         | Cell Signaling   | 46535         | 1:1000                | <a href="https://www.cellsignal.com/products/primary-antibodies/smad4-d3r4n-xp-rabbit-mab/46535">https://www.cellsignal.com/products/primary-antibodies/smad4-d3r4n-xp-rabbit-mab/46535</a>                                                                                                                                                                                             |
| SMAD4                         | Genetex          | GTX01674      | 1:100                 | <a href="https://www.genetex.com/Product/Detail/SMAD4-antibody-B-8/GTX01674">https://www.genetex.com/Product/Detail/SMAD4-antibody-B-8/GTX01674</a>                                                                                                                                                                                                                                     |
| GATA4                         | Cell Signaling   | 36966         | 1:1000                | <a href="https://www.cellsignal.com/products/primary-antibodies/gata-4-d3a3m-rabbit-mab/36966">https://www.cellsignal.com/products/primary-antibodies/gata-4-d3a3m-rabbit-mab/36966</a>                                                                                                                                                                                                 |
| HDAC1                         | Cell Signaling   | 34589         | 1:1000                | <a href="https://www.cellsignal.com/products/primary-antibodies/hdac1-d5c6u-xp-rabbit-mab/34589">https://www.cellsignal.com/products/primary-antibodies/hdac1-d5c6u-xp-rabbit-mab/34589</a>                                                                                                                                                                                             |
| Lamin B                       | Cell Signaling   | 12586         | 1:1000                | <a href="https://www.cellsignal.com/products/primary-antibodies/lamin-b1-d4q4z-rabbit-mab/12586">https://www.cellsignal.com/products/primary-antibodies/lamin-b1-d4q4z-rabbit-mab/12586</a>                                                                                                                                                                                             |
| Lamin A/C                     | Cell Signaling   | 4777s         | 1:1000                | <a href="https://www.cellsignal.com/products/primary-antibodies/lamin-a-c-4c11-mouse-mab/4777?site-search-type=Products&amp;N=4294956287&amp;Ntt=4777s&amp;fromPage=plp&amp;_requestid=599758">https://www.cellsignal.com/products/primary-antibodies/lamin-a-c-4c11-mouse-mab/4777?site-search-type=Products&amp;N=4294956287&amp;Ntt=4777s&amp;fromPage=plp&amp;_requestid=599758</a> |
| Actin1 alpha                  | Proteintech      | 17521-1-AP    | 1:1000                | <a href="https://www.ptglab.com/products/ACTA1-skeletal-Muscle-Actin-Specific-Antibody-17521-1-AP.htm">https://www.ptglab.com/products/ACTA1-skeletal-Muscle-Actin-Specific-Antibody-17521-1-AP.htm</a>                                                                                                                                                                                 |
| RFP                           | Abcam            | Ab62341       | 1:2000                | <a href="https://www.abcam.com/rfp-antibody-ab62341.html">https://www.abcam.com/rfp-antibody-ab62341.html</a>                                                                                                                                                                                                                                                                           |
| PKA $\alpha$ cat              | Santacruz        | Sc-28315      | 1:1000                | <a href="https://www.scbt.com/p/pkaalpha-cat-antibody-a-2">https://www.scbt.com/p/pkaalpha-cat-antibody-a-2</a>                                                                                                                                                                                                                                                                         |

DOI [to be added]

|                 |                             |             |        |                                                                                                                                                                                                                                                                                                                                 |
|-----------------|-----------------------------|-------------|--------|---------------------------------------------------------------------------------------------------------------------------------------------------------------------------------------------------------------------------------------------------------------------------------------------------------------------------------|
| PKARII $\alpha$ | Santacruz                   | Sc-908      | 1:1000 | <a href="https://www.scbt.com/p/pka-ii-alpha-reg-antibody-c-20">https://www.scbt.com/p/pka-ii-alpha-reg-antibody-c-20</a>                                                                                                                                                                                                       |
| GFP             | abcam                       | Ab6556      | 1:1000 | <a href="https://www.abcam.com/gfp-antibody-ab6556.html">https://www.abcam.com/gfp-antibody-ab6556.html</a>                                                                                                                                                                                                                     |
| Anti mouse HRP  | SCBT                        | Sc2005      | 1:5000 | <a href="https://www.scbt.com/p/goat-anti-mouse-igg-hrp">https://www.scbt.com/p/goat-anti-mouse-igg-hrp</a>                                                                                                                                                                                                                     |
| Anti mouse HRP  | Jackson immuno research lab | 115-035-003 | 1:5000 | <a href="https://www.jacksonimmuno.com/catalog/products/115-035-003">https://www.jacksonimmuno.com/catalog/products/115-035-003</a>                                                                                                                                                                                             |
| Anti Rabbit HRP | SCBT                        | Sc2030      | 1:5000 | <a href="https://www.scbt.com/p/goat-anti-rabbit-igg-hrp-cruz-marker-compatible">https://www.scbt.com/p/goat-anti-rabbit-igg-hrp-cruz-marker-compatible</a>                                                                                                                                                                     |
| Anti rabbit HRP | Jackson immuno research lab | 11-035-003  | 1:5000 | <a href="https://www.google.com/search?q=11-035-003&amp;rlz=1C1CHBF_enGB833GB833&amp;oq=11-035-003&amp;aqs=chrome..69i57.678j0j4&amp;sourceid=chrome&amp;ie=UTF-8">https://www.google.com/search?q=11-035-003&amp;rlz=1C1CHBF_enGB833GB833&amp;oq=11-035-003&amp;aqs=chrome..69i57.678j0j4&amp;sourceid=chrome&amp;ie=UTF-8</a> |
| Alexaflour 647  | Thermo Fischer Scientific   | A-21235     | 1:350  | <a href="https://www.thermofisher.com/antibody/product/Goat-anti-Mouse-IgG-H-L-Cross-Adsorbed-Secondary-Antibody-Polyclonal/A-21235">https://www.thermofisher.com/antibody/product/Goat-anti-Mouse-IgG-H-L-Cross-Adsorbed-Secondary-Antibody-Polyclonal/A-21235</a>                                                             |
| Alexaflour 488  | Thermo Fischer Scientific   | A-11008     | 1:350  | <a href="https://www.thermofisher.com/antibody/product/Goat-anti-Rabbit-IgG-H-L-Cross-Adsorbed-Secondary-Antibody-Polyclonal/A-11008">https://www.thermofisher.com/antibody/product/Goat-anti-Rabbit-IgG-H-L-Cross-Adsorbed-Secondary-Antibody-Polyclonal/A-11008</a>                                                           |

## DNA/cDNA Clones

| Clone Name      | Sequence          | Source / Repository | Persistent ID / URL                                                                                                                                                                                                                                                           |
|-----------------|-------------------|---------------------|-------------------------------------------------------------------------------------------------------------------------------------------------------------------------------------------------------------------------------------------------------------------------------|
| Flag SMAD4      | Clone Id Ora42717 | Genescript          | <a href="https://www.genscript.com/gene/rattus-norvegicus/50554/smad4.html">https://www.genscript.com/gene/rattus-norvegicus/50554/smad4.html</a>                                                                                                                             |
| Flag HDAC1      | Clone Id Ora13308 | Genescript          | <a href="https://www.genscript.com/gene/rattus-norvegicus/297893/hdac1.html">https://www.genscript.com/gene/rattus-norvegicus/297893/hdac1.html</a>                                                                                                                           |
| mCherry         | Cat # 1767        | Vector Biolabs      | <a href="https://www.vectorbiolabs.com/product/1767-mcherry-adenovirus/">https://www.vectorbiolabs.com/product/1767-mcherry-adenovirus/</a>                                                                                                                                   |
| Ad-HDAC1 virus  | Cat # 1498        | Vector Biolabs      | <a href="https://www.vectorbiolabs.com/product/1498-histone-deacetylase-1-adenovirus/?azsid=5f965e30-8caa-4c14-99f2-30f63f1ddd14&amp;i=1">https://www.vectorbiolabs.com/product/1498-histone-deacetylase-1-adenovirus/?azsid=5f965e30-8caa-4c14-99f2-30f63f1ddd14&amp;i=1</a> |
| Ad-RFP PDE3A1   |                   | Vector Biolabs      | Customised                                                                                                                                                                                                                                                                    |
| Ad-RFP PDE3A2   |                   | Vector Biolabs      | Customised                                                                                                                                                                                                                                                                    |
| Ad-RFP DNPDE3A1 |                   | Vector Biolabs      | Customised                                                                                                                                                                                                                                                                    |
| Ad-RFP DNPDE3A2 |                   | Vector Biolabs      | Customised                                                                                                                                                                                                                                                                    |

| Name                       | Vendor or Source                         | Sex (F, M, or unknown) | Persistent ID / URL                                                                                 |
|----------------------------|------------------------------------------|------------------------|-----------------------------------------------------------------------------------------------------|
| hiPSC line LUMCi027-A-1    | Leiden University Medical Center, LUMC   | Female                 | <a href="https://hpscereg.eu/cell-line/LUMCi027-A-1">https://hpscereg.eu/cell-line/LUMCi027-A-1</a> |
| hiPSC line LUMC0099iCTRL04 | Leiden University Medical Center, LUMC   | Female                 | <a href="https://hpscereg.eu/cell-line/LUMCi004-A">https://hpscereg.eu/cell-line/LUMCi004-A</a>     |
| AX5858                     | Censo biotechnologies Ltd, Edinburgh, UK | Female                 | <a href="https://axolbio.com/">https://axolbio.com/</a>                                             |

DOI [to be added]

|                                 |                                                                                                                      |         |                                                                                             |
|---------------------------------|----------------------------------------------------------------------------------------------------------------------|---------|---------------------------------------------------------------------------------------------|
| hiPSC line M00398C08            | A gift from Christian Pinset, Institute for Stem cell Therapy and Exploration of Monogenic diseases (I-Stem, France) | unknown | <a href="https://orcid.org/0000-0002-7840-2179">https://orcid.org/0000-0002-7840-2179</a>   |
| hiPSC line M00180               | A gift from Christian Pinset, Institute for Stem cell Therapy and Exploration of Monogenic diseases (I-Stem, France) | Female  | <a href="https://orcid.org/0000-0002-7840-2179">https://orcid.org/0000-0002-7840-2179</a>   |
| HEK 293T "293T (ATCC CRL-3216)" | American Type Culture Collection                                                                                     | female  | <a href="https://www.atcc.org/products/crl-3216">https://www.atcc.org/products/crl-3216</a> |

## Data & Code Availability

| Description                                                                                                                                                                                                                                                                            | Source / Repository                        | Persistent ID / URL                                                                          |
|----------------------------------------------------------------------------------------------------------------------------------------------------------------------------------------------------------------------------------------------------------------------------------------|--------------------------------------------|----------------------------------------------------------------------------------------------|
| Project files generated from mass spectrometry analysis of PDE interactome and phosphoproteome experiments deposited under the project name "Integrated proteomics unveils regulation of cardiac myocytes hypertrophic growth by a nuclear cAMP nanodomain under the control of PDE3A" | PRIDE (PRoteomics IDentification Database) | <a href="http://www.ebi.ac.uk/pride">www.ebi.ac.uk/pride</a><br>Project accession: PXD033773 |
|                                                                                                                                                                                                                                                                                        |                                            |                                                                                              |

## Other

| Description                                                               | Source / Repository | Persistent ID / URL                                                                                     |
|---------------------------------------------------------------------------|---------------------|---------------------------------------------------------------------------------------------------------|
| Fluorimetric histone deacetylase kit CS1010                               | Sigma- Aldrich      | <a href="https://www.sigmaaldrich.com/">https://www.sigmaaldrich.com/</a>                               |
| Raeasy kit ( Cat no 74104)                                                | Qiagen              | <a href="http://www.qiagen.com/">http://www.qiagen.com/</a>                                             |
| QuantiTect® Reverse Transcription Kit (Cat no 205311)                     | Qiagen              | <a href="http://www.qiagen.com/">http://www.qiagen.com/</a>                                             |
| The NE-PER Nuclear and Cytoplasmic Extraction Reagent Kit ( Cat No 78333) | Thermo Fischer      | <a href="https://www.thermofisher.com/uk/en/home.html">https://www.thermofisher.com/uk/en/home.html</a> |
| iScript™ cDNA Synthesis Kit                                               | Biorad              | <a href="https://www.bio-rad.com/">https://www.bio-rad.com/</a>                                         |
| Norepinephrine                                                            | Sigma- Aldrich      | <a href="https://www.sigmaaldrich.com/">https://www.sigmaaldrich.com/</a>                               |
| Cilostamide, isoproterenol                                                | Sigma- Aldrich      | <a href="https://www.sigmaaldrich.com/">https://www.sigmaaldrich.com/</a>                               |
| <a href="https://www.sigmaaldrich.com/">https://www.sigmaaldrich.com/</a> | Sigma- Aldrich      | <a href="https://www.sigmaaldrich.com/">https://www.sigmaaldrich.com/</a>                               |
| 3-isobutyl-1-methylxanthine (IBMX)                                        | Sigma- Aldrich      | <a href="https://www.sigmaaldrich.com/">https://www.sigmaaldrich.com/</a>                               |
| Norepinephrine                                                            | Sigma- Aldrich      | <a href="https://www.sigmaaldrich.com/">https://www.sigmaaldrich.com/</a>                               |
| BAY 60-7550                                                               | Sigma- Aldrich      | <a href="https://www.sigmaaldrich.com/">https://www.sigmaaldrich.com/</a>                               |
